# Supplementary material for: The effectiveness of jute and coir erosion control blankets in different field and laboratory conditions
Source: Copernicus journal article supplement (doi:10.5194/se-2016-8), 2016-01-18

1 **The effectiveness of jute and coir erosion control blankets in**  
2 **different field and laboratory conditions**

3 J. Kalibová<sup>1</sup>, L. Jačka<sup>2</sup>, J. Petruš<sup>1</sup>

4 <sup>1</sup>Department of Land Use and Improvement, Czech University of Life Sciences Prague, Prague, Kamýcká 129,  
5 Praha 6 – Suchdol, 165 21, Czech Republic

6 <sup>2</sup>Department of Water Resources and Environmental Modeling, Czech University of Life Sciences Prague, Prague,  
7 Kamýcká 129, Praha 6 – Suchdol, 165 21, Czech Republic

8

9 *Correspondence to:* J. Kalibová (kalibova@fzp.czu.cz)

10 **Abstract.** A vegetation cover is found to be an ideal solution to most problems with erosion on steep slopes.  
11 Biodegradable geotextiles (GTX) have been proved to provide a sufficient protection against soil loss in the period  
12 before the vegetation reaches maturity. In this study, 500 g.m<sup>-2</sup> jute (*J500*), 400 g.m<sup>-2</sup> (*C400*), and 700 g.m<sup>-2</sup> coir  
13 (*C700*) GTX were installed firstly on 9° slope in “no-infiltration” laboratory conditions, secondly on 27° slope in  
14 natural field conditions. The impact of GTX on runoff and soil loss was investigated to compare the performance  
15 of GTX in different conditions. Laboratory runoff ratio (percentage portion of control plot) equaled 78 %, 83 %  
16 and 91 % and peak discharge ratio equaled 83 %, 91 % and 97 % for *J500*, *C700* and *C400*, respectively. In the  
17 field, a runoff ratio of 31 %, 62 % and 79 % and peak discharge ratio of 37 %, 74 % and 87 % were recorded for  
18 *C700*, *J500* and *C400*, respectively. All tested GTX significantly decreased soil erosion. The highest soil loss  
19 reduction in the field was observed for *J500* (by 99.4%) followed by *C700* (by 97.9%) and *C400* (by 93.8%).  
20 Irrespective of slope gradient or experiment condition, *C400* provided lower runoff volume and peak discharge  
21 control than *J500* and *C700*. The performance ranking of *J500* and *C700* in the laboratory differed from the field,  
22 which may be explained by different slope gradient and also by the role of soil, which was not included in the  
23 laboratory experiment.

24  
25 Key words: Soil loss, Steep slope, Runoff, Biological geotextiles, Rainfall simulator

## 26 1 Introduction

27 Land degradation causes high erosion rates as a consequence of agriculture, grazing, mining, forest fires or  
28 deforestation and this causes an economic, social and environmental damage (Cerdà, 1998, Cerdà et al., 2010,  
29 Erkossa et al., 2015, Keesstra et al., 2014, Lieskovský and Kenderessy, 2014, Moreno-Ramón et al., 2014, Stanchi  
30 et al., 2015). However, the largest erosion rates and the most degraded soils are usually found in areas affected by  
31 developments, infrastructures or urbanization (Cerdà, 2007, Pereira et al., 2015, Sadeghi et al., 2015, Seutloali and  
32 Beckedahl, 2015, [Yuan et al., 2015](#)).

33 Civil engineering projects often result in steep slopes with bare soil, which is highly vulnerable to soil erosion,  
34 caused either by impact energy of the rain drops or by surface runoff (Weggel and Rustom, 1992). Well-  
35 established, low-growing, dense vegetation cover is able to control soil loss by two or three orders of magnitude  
36 compared to bare soil condition ([Keesstra et al., 2016](#), [Ola et al., 2015](#), Rickson, 2006). The highest reduction of  
37 erosive runoff was recorded on permanently grassed plots (Álvarez-Mozos et al., 2014). However, the  
38 establishment of vegetation cover can be disrupted during early plant growth stages, leaving the slopes exposed to  
39 further erosion processes with negative consequences for slope stability (Rickson, 1988). Soils play a pivotal role  
40 in major global biogeochemical cycles (carbon, nutrient and water), while hosting the largest diversity of  
41 organisms on land. Because of this, soils deliver fundamental ecosystem services, and management to change a  
42 soil process in support of one ecosystem service can either provide co-benefits to other services or can result in  
43 trade-offs. Therefore, the need of protecting the soil is nonnegligible (Berendse et al., 2015, Brevik et al., 2012,  
44 Decock et al., 2015, Keesstra et al., 2012, Smith et al., 2015). This is the reason why there is a trend in the research  
45 to protect the soil with mulches, amendments and other erosion control measures (Álvarez-Mozos et al., 2014, Hu  
46 et al., 2015, Hueso-González et al., 2014, Keesstra et al., 2016, Prosdocimi et al., 2016, Yazdanpanah et al., 201).  
47 Biological/biodegradable geotextiles (GTX), made out of jute, coir, rice, straw etc., have often been proved to be  
48 an effective, sustainable and eco-friendly alternative to synthetic erosion control materials used for preventing soil  
49 erosion and subsequent slope degradation processes in the period before vegetation reaches maturity (Fullen et al.,  
50 2007, Khan and Binoy, 2012, Langford and Coleman, 1996, Morgan and Rickson, 1995, Ogbobe et al, 1998,  
51 Sutherland and Ziegler, 2007, etc.). **The range of GTX is wide. Based on the ratio of GTX' cost versus  
52 effectiveness, the choice of an individual product occurs to be most convenient.**

53 Many case studies evaluating the effect of jute and coir GTX on slopes have been carried out across the world, but  
54 the reported effectiveness of GTX varies (Giménez-Morera et al., 2010) (see Table 1). Therefore, the results cannot  
55 be generalized (Cantón et al., 2011, Rickson, 2005). Furthermore, because of various site conditions, it is difficult  
56 to determine the extent to which the soil loss reduction was caused by GTX themselves and not by other factors  
57 (vegetation cover etc.) (Fifield, 1992, Toy and Hardley, 1987).

58 This paper presents a study, in which the effectiveness of three jute and coir fibre rolled erosion control systems  
59 (see Table 2), that are commercially available and widely applied world-wide, was tested under both laboratory  
60 and field conditions. No product with dense coverage (non-woven) was included, as it is not as effective in  
61 reducing runoff (Luo et al., 2013) and can produce even more runoff than bare soil (Davies et al., 2006, Mitchell  
62 et al., 2003).

63 **Unlike in other previous laboratory studies, the impact of GTX was examined on “no-soil” subgrade, to omit one  
64 of the most variable factors affecting soil erosion – soil itself (Smets et al., 2011) – and to assess the effectiveness  
65 based on nothing but GTX' properties.** Due to the infiltration process, soil supports the erosion control effect of  
66 GTX providing less water for overland flow (Beven, 2011). Assuming that soil would affect all GTX equally in  
67 the field, the laboratory records of surface runoff volume (L) and peak discharges ( $L \cdot s^{-1}$ ) reduction should  
68 proportionally match the data from field experiments. Concerning the shear stress of overland flow, the character  
69 of surface runoff volume and velocity reduction in the laboratory should reflect soil loss reduction in the field as  
70 well (Harmon and Doe, 2001, Morgan and Rickson, 1995, Thompson, 2001).

71 The objective of this experiment was to test the impact of biodegradable erosion control GTX on surface runoff  
72 on a slope exposed to simulated rainfall under laboratory and field conditions; to rank the effectiveness of GTX in  
73 runoff reduction; to compare the runoff data trends under laboratory conditions (where soil subgrade and

74 infiltration process were excluded) with data trends under different field conditions (including soil subgrade and  
75 different slope gradient).

## 76 2 Materials and methods

### 77 2.1 Laboratory experiment

78 Laboratory experiments were conducted in the rainfall simulation laboratory at the Czech University of Life  
79 Sciences Prague, using a Norton ladder-type rainfall simulator. Rainfall simulations are being used since the 30's  
80 by scientists to study soil erosion by water and soil hydrology. They are one of the most used and most successful  
81 tools used in different disciplines, such as agronomy, hydrology and geomorphology (Cerdà, 1998, Martínez-  
82 Murillo et al., 2013, Rodrigo Comino et al., 2015, 2016, Iserloh et al., 2013a, 2013b). In this study, the Norton  
83 simulator uses four Veejet 80100 nozzles, with water pressure of 0.04 MPa, height of 1.9 m and target area of 4.9  
84 m × 1.05 m. The main rainfall characteristics are given in Table 3. A slope gradient of 9° was used for the  
85 experiment. An impermeable plastic film spread over the test bed was used as a control. The tested GTX were then  
86 laid onto the plastic film to simulate no-infiltration conditions during the simulation (see Fig. 1). All treatments  
87 were exposed to rainfall of 1.75 mm.min<sup>-1</sup> intensity and 15 min duration. Ten rainfall simulations were carried out  
88 on each treatment (control, J500, C400, C700). To provide constant starting conditions, a 15-minute rainfall of  
89 1.75 mm.min<sup>-1</sup> intensity was applied before each simulation. In a rainfall event, runoff initiation time  $t_i$  [s] was  
90 recorded, runoff was collected by a mechanical toggle flow-meter with electronic recording of time for each toggle  
91 and total runoff volume at time = 15 min  $R_{15}$  [L] and peak discharge  $Q$  [L.s<sup>-1</sup>] was measured. An outline of  
92 laboratory experiments is given in Table 4.

### 93 2.2 Field experiment

94 The field simulations were carried out on the south slope of the Rokycany–Pilsen rail corridor near the village of  
95 Klabava (49°44'56.938"N, 13°32'17.887"E) in the Pilsen Region, Czech Republic. According to Quitt's  
96 classification, Klabava falls into a moderately warm region with mean annual air temperature 8°C and mean annual  
97 precipitation 550 mm (Tolasz, 2007). The experimental slope was formed by a 1:2 (27°) cut. The stabilized unmade  
98 ground was covered by a gravelly loamy soil layer of 0.3 m thickness, 1.40 g.cm<sup>-3</sup> bulk density and 47 % porosity.  
99 A particle size analysis was performed, using hydrometer method (SIST-TS CEN ISO/TS. 17892-4:2004, 2004).  
100 The soil texture was classified using the system of the United States Department of Agriculture. The tested soil  
101 was classified as gravelly loam (24 % clay, 40 % silt, 36 % sand). Percentage of gravel (> 2 mm) was 26 %.  
102 Estimated organic matter content of soil was 3.5 %. The loss-on-ignition method (heated destruction of all organic  
103 matter) was used for the calculation of the organic matter content in the soil (ASTM, 2000, Schumacher, 2002,  
104 Nelson and Sommers, 1982).  
105 Four rectangular plots (one control and three for the GTX treatments), each covering an area of 1.8 m × 8.5 m,  
106 were outlined by iron barriers on each side and a triangular collecting trough at the bottom (see Fig. 2), afterwards  
107 erosion control nets were installed. A bare soil plot was used as control.  
108 The rainfall was simulated by 4 FullJet nozzles, with water pressure of 0.03 MPa and height 2.4 m above the plots.  
109 Rainfall application did not differ significantly among treatments ( $\alpha=0.05$ ). Three replications of each treatment  
110 were carried out at overall mean intensity of 1.33 ± 2 mm.min<sup>-1</sup>. (a 10-year return period at the study site). To  
111 provide constant starting conditions, a 15-minute rainfall of 1.33 mm.min<sup>-1</sup> intensity was applied before each  
112 simulation. For an outline of field experiment see Table 4.  
113 For operational reasons, it was necessary to spread the simulations over a period of two days. The measurements  
114 were therefore carried out under slightly different moisture conditions. The control treatment was measured on the  
115 first day with initial volumetric soil moisture content being 20.7 %. The geotextile treatments were measured the  
116 following day with initial volumetric soil moisture content being 13.1 % (an average value of nine records – three  
117 for each plot; the individual values did not differ significantly). The volumetric soil moisture content was  
118 determined using the gravimetric method (e.g. Kutílek and Nielsen, 1994) from undisturbed soil samples (100 cm<sup>3</sup>)  
119 that were collected in the top soil. In the rainfall event, runoff initiation time  $t_i$  [s] was recorded, runoff was  
120 collected by a mechanical toggle flow meter with electronic recording of time for each toggle and the total runoff  
121 volume [L] and discharge [L.s<sup>-1</sup>] were measured. After the rainfall event, sediment concentration [g.L<sup>-1</sup>] of the  
122 runoff was determined by oven-drying five collected runoff samples at 105°C for 48 h and subsequent weighing

123 of the samples, and sediment load (soil loss SL) [g] was calculated by multiplying the mean sediment concentration  
124 by total runoff volume.

### 125 2.3 Data analysis

126 All analyses were performed using Excel 2010 and R Statistical Software. One-way analysis of means was used  
127 to test whether the differences in laboratory values of time to runoff initiation  $t_i$  [s], runoff [L] at time  $t=15$  min  
128 ( $R_{15}$ ) and peak discharge  $Q$  [ $L \cdot s^{-1}$ ] are caused by sampling variation, at significance level 0.05. Welch Two Sample  
129 t-test, not assuming equal variances, was used to compare mean values of  $t_i$ ,  $R_{15}$  and  $Q$  for each treatment. The  
130 null hypothesis was defined as follows: The true difference in means is equal to zero.

131 In order to compare runoff (and soil loss) rates from field and laboratory plots, runoff ratios  $RR_{15}$  (Eq. 1), peak  
132 discharge ratios  $QR$  (Eq. 2) and soil loss ratios  $SLR$  (Eq. 3) were calculated and expressed as a portion of control  
133 [%]:

$$134 \quad RR_{15} = \frac{R_{15 \text{ geotextile}}}{R_{15 \text{ control}}} \times 100, \quad (1)$$

$$135 \quad QR = \frac{Q_{\text{geotextile}}}{Q_{\text{control}}} \times 100, \quad (2)$$

$$136 \quad SLR = \frac{SL_{\text{geotextile}}}{SL_{\text{control}}} \times 100, \quad (3)$$

137 Ratios were calculated from mean values of variables.

### 138 3 Results

139 Statistical description of results of peak discharge  $Q$  ( $L \cdot s^{-1}$ ) is shown in Table 5. Runoff  $R_{15}$  data were analysed  
140 analogically.

141 Mean time to runoff initiation of the simulated rainfall in the laboratory was 16.3 s (standard deviation  $\sigma = 0.46$  s)  
142 for control, 21.3 s ( $\sigma = 0.46$  s) for *J500*, 21.1 s ( $\sigma = 1.30$  s) for *C400* and 25.8 s ( $\sigma = 1.54$  s) for *C700*. The results  
143 of a one-way analysis of mean values of runoff  $t_i$  ( $F = 28.484$ , num df = 2.000, denom df = 14.076, p-value =  $1.127$   
144  $\times 10^{-5}$ , equal variance of datasets are not assumed) indicate that the differences in mean values of measured  
145 geotextile samples are not caused by sampling variation, at significance level 0.05. The null hypothesis “The true  
146 difference in means of time to runoff initiation is equal to zero” was rejected (by Welch Two Sample t-test, not  
147 assuming equal variances) for all comparisons except *C700* vs *C400* at significance level 0.05 (see Table 7).

148 Mean runoff  $R_{15}$  in the laboratory was 130.9 L ( $\sigma = 0.30$  L) for control, 102.2 L ( $\sigma = 5.21$  L) for *J500*, 118.6 L ( $\sigma$   
149  $= 1.43$  L) for *C400* and 109.0 L ( $\sigma = 1.79$  L) for *C700*. The results of a one-way analysis of mean values of runoff  
150  $R_{15}$  ( $F = 100.414$ , num df = 2.000, denom df = 16.201, p-value =  $7.432 \times 10^{-10}$ , equal variance of datasets are not  
151 assumed) indicate that the differences in mean values of measured geotextile samples are not caused by sampling  
152 variation, at significance level 0.05. The null hypothesis “The true difference in means of runoff is equal to zero”  
153 was rejected for all comparisons (see Table 7).

154 The results of a one-way analysis of mean values of peak discharge  $Q$  ( $F = 52.051$ , num df = 2.000, denom df =  
155  $13.494$ , p-value =  $4.53 \times 10^{-7}$ , equal variance of datasets are not assumed) indicate that the differences in mean  
156 values of measured geotextile samples are not caused by sampling variation, at significance level 0.05. The null  
157 hypothesis “The true difference in means of peak discharge is equal to zero” was rejected for all comparisons (see  
158 Table 7).

159 In short, all GTX samples significantly delayed the runoff initiation in comparison with control. Jute *J500* was  
160 proved to be significantly more effective than both coir GTX. No statistically significant difference in time to  
161 runoff initiation was found between coir GTX *C400* and *C700*. Mean values of runoff and discharge are  
162 significantly different for all tested GTX. All GTX significantly reduced runoff and peak discharge with jute net  
163 *J500* being the most effective under laboratory conditions. The results of the rainfall simulation experiments in the  
164 laboratory are shown in Fig. 3 and Fig. 4.

165 Mean time to runoff initiation of the simulated rainfall in the field was 295 s (792 s, 50 s and 44 s for first, second  
166 and third rainfall event) for control, 120 s (-, 120 s, 120 s) for *J500*, 268 s (-, 280 s, 255 s) for *C400* and 325 s (-,  
167 405 s, 245 s) for *C700*. For *J500*, *C400* and *C700* no runoff was produced during the first rainfall event.

168 In general, control plots tended to produce highest runoff volume (L) and discharge ( $L \cdot s^{-1}$ ). Concerning the time  
169 of runoff initiation, runoff was most quickly produced at the control plot, followed by coir *C400*, jute *J500* and  
170 coir *C700* in the laboratory. In the field, *J500* treated plots produced runoff faster than *C700*.

171 The order control – *C400* – *J500* – *C700* matches the impact of GTX on runoff volume and discharge for the first  
172 rainfall event in the laboratory. For next replications, an obviously decreasing trend of  $R_{15}$  and  $Q$  for *J500* was

173 recorded, showing jute GTX to be the most effective. Other GTX seemed to provide slightly increasing trends  
174 (Fig. 3, 4).  
175 Table 6 shows a comparison of runoff ( $RR_{15}$ ) and peak discharge (QR) ratios for both laboratory and field  
176 conditions. In the laboratory, the greatest decrease in  $RR_{15}$  was recorded by the *J500* jute net ( $RR_{15} = 78\%$ ) in  
177 comparison with control (100%). The order of effectiveness of each treatment in the laboratory was identical for  
178 both runoff volume and peak discharge: 1. *J500*, 2. *C700* and 3. *C400*.  
179 Different effectiveness ranking was observed in the field. The highest reductions of runoff volume and peak  
180 discharge were observed for coir *C700* ( $RR_{15} = 31\%$ ,  $QR = 37\%$ ) followed by jute *J500* ( $RR_{15} = 62\%$ ,  $QR = 74$   
181  $\%$ ).  
182 Results of soil loss ratio from the field experiment are also given in Table 6. All GTX provided a great reduction  
183 of soil loss with jute *J500* being the most effective followed by coir *C700* and *C400*.  
184

## 185 4 Discussion

### 186 4.1 Time to runoff initiation

187 In general, control plots (bare soil/impermeable plastic film without GTX) have a significantly faster response to  
188 rainfall than GTX-treated plots (also reported by Cerdà et al., 2009). The performance of GTX seems to be highly  
189 influenced by the infiltration rate as the surface runoff was initiated after less than 30 s on impermeable subgrade  
190 (laboratory experiment) and after two-six minutes on soil (field experiment). The very short time to runoff  
191 initiation means that any thunderstorm will contribute to runoff and soil loss on sloping bare soil (Cerdà et al.,  
192 2009). The high bulk density of the soil ( $1.40\text{ g}\cdot\text{cm}^{-3}$ ) (frequently present on slopes created during civil engineering  
193 projects) can be the explanation for the fast runoff initiation, and the large runoff volumes and sediment available  
194 are due to raindrop impact on bare soils (Cerdà and Jurgensen, 2008).  
195 The results of laboratory-based rainfall simulations indicated that the GTX significantly delayed the time to runoff  
196 initiation. Similar results were obtained by Shao et al. (2014) or Sutherland and Ziegler (2007). According to mean  
197 values, *C700* performed better than *J500*. When studying the results of individual replications, *J500* reached the  
198 peak discharge earlier than *C700*, but the discharge values remain lower than for *C700*. Time of runoff initiation  
199 was longer for *C700*, but higher peak discharge values were observed. Better performance of jute *J500* compared  
200 to both coir GTX was probably caused by lower water absorbing capacity and lower flexibility of coir GTX, due  
201 to which the GTX did not lay directly on the subgrade, allowing water to flow over a smoother surface under GTX.  
202 Same observation was previously reported also by Rickson (2006). In the literature, significant differences between  
203 GTX-covered and control (bare soil) plots were both confirmed (Sutherland and Ziegler, 2007) and not proved  
204 (Rickson, 2000). Possible explanation could be the different infiltration capacity of used soil subgrade. Rickson  
205 (2000) used more permeable sandy loam, while Sutherland et Ziegler (2007) used clay (see Table 1), therefore it  
206 seems that the smoother and less permeable the subgrade, the higher is the delay in the GTX' effect, as the low  
207 infiltration capacity of subgrade provides higher volume of surface runoff.

### 208 4.2 Runoff volume reduction

209 Results of laboratory simulations showed a significant decrease in runoff volume [L] from GTX-treated plots.  
210 Similar results were reached by Khan and Binoy (2012), Shao et al. (2014) or Sutherland and Ziegler, 2007 (see  
211 Table 1). On contrary, some studies (both field and laboratory) concluded, that GTX increase the runoff volume  
212 (Álvarez-Mozos et al., 2014, Giménez-Morera et al., 2010, Kertézs et al., 2007). The increase might be caused by  
213 a dense cover of GTX (Mitchel et al., 2003) or high slope gradient when water can flow through the GTX fibers  
214 without infiltration into the soil (Álvarez-Mozos et al., 2014). In this study, the runoff control effect of GTX was  
215 supported by the infiltration process leading to higher runoff reduction in the field in comparison to laboratory,  
216 despite higher slope gradient ( $27^\circ$ ).

217 Authors presumed, that due to the infiltration process, soil would support the erosion control effect of GTX  
218 providing less water for overland flow (Beven, 2011). Assuming that soil would affect all GTX equally in the  
219 field, the laboratory records of surface runoff volume (L) and peak discharges ( $\text{L}\cdot\text{s}^{-1}$ ) reduction should  
220 proportionally match the data from field experiments. However, the GTX effectiveness ranking in the laboratory  
221 significantly differed from the field data. In the laboratory the runoff ratios of 78%, 83% and 91% were recorded  
222 for jute *J500*, coir *C700* and coir *C400*, respectively. In the field, the runoff ratios were the following: 62%, 31%  
223 and 79% for the same order of GTX (see Table 6). Coir GTX *C700* performed significantly higher runoff reduction  
224 than jute *J500* in the field. The same result were reported by Álvarez-Mozos et al. (2014) from a  $60^\circ$  slope, while  
225 on  $45^\circ$  slope jute performed better than coir. If more replications were carried out in the field, a different trend  
226 possibly might be found, because a decreasing trend of runoff volume is obvious for jute *J500* under laboratory

227 “no-soil” conditions, while coir *C700* shows an increasing trend (see Fig. 3). Similar behaviour was observed in  
228 the field, where the runoff ratio of 66 % and 59 % (first and second replication) was observed for *J500* and 24 %  
229 and 38 % for *C700*. More replications in the field would prove whether the decreasing trend for jute and increasing  
230 trend for coir would continue in the field alike during the laboratory experiment.  
231 Higher runoff reduction of *C700* might also be explained by its slightly higher loop size in comparison with *J500*  
232 (see Table 2). In theory, *C700* might provide more space for rainfall water to fall directly to the soil surface and  
233 then infiltrate, which would lead to lower surface runoff volume. While on jute-treated plot the rainfall water was  
234 initially absorbed by the fibers and then brought down through them due to gravity.

#### 235 **4. 3 Soil loss reduction**

236 According to laboratory test, jute *J500* seemed to have the highest impact on peak discharge and runoff velocity.  
237 Therefore, lower shear stress might be assumed for jute *J500* (Thompson, 2001) than for coir GTX which would  
238 lead to lower erosion rate in the field. This was confirmed both in the field experiment of this study and in the  
239 work of Rickson (2000, 2006). All GTX significantly reduced soil loss (see Table 6). Despite much higher runoff  
240 volume of jute-treated plot, SLR equaled to 0.6 % for jute *J500*, followed by coir *C700* with SLR = 2.1 %. The  
241 performance of jute and coir *C700* may be considered to be comparable as the little difference might have been  
242 caused by soil loss measurement error.

243 Álvarez-Mozos et al. (2014) reported similar behaviour of jute and coir GTX. In their study, jute performed better  
244 runoff reduction but higher soil loss than coir on 45° slope. On 60° slope the situation was reversed, jute showed  
245 worse runoff reduction but better erosion control than coir. Authors explain this by the theory that on gentle or  
246 moderate slopes, biological GTX might absorb rainfall water and slow runoff generation, whereas on steep slopes  
247 water can slip through the geotextile fibers and create superficial flow paths without infiltrating into the soil. This  
248 factor seems to be more crucial for jute than coir due to its higher water absorbing capacity (Gosh, 2014). In this  
249 study, the runoff control effect of GTX varied under different slope gradients even when lower values (9° and 27°)  
250 were used. It is interesting that differences in performance were recorded for slope ranges which do not overlap  
251 (9° vs 27° and 45° vs 60°). A threshold value of slope gradient, at which GTX' behaviour changes, needs to be  
252 established. Potentially, if the field and laboratory experiments were both carried out on slope gradient either below  
253 or above this threshold, the match between datasets would be reached.

254 The rigidity of GTX fibers may play an important role too, as the smoother structure of jute GTX probably provides  
255 better condition for water flow through fibers in comparison with the tougher coir fibers.

256 Furthermore, the contact between GTX and soil plays a very important role (Midha and Suresh Kumar, 2013). It  
257 seems to decrease as the slope gradient and GTX material rigidity increases (Chen et al., 2011, Midha and Suresh  
258 Kumar, 2013). This may apply also for this study – jute probably absorbed more rainfall water into its fibers and  
259 thanks to gravity this water was brought down through the fibers, causing almost no erosion. In spite of being  
260 provided by the same supplier, coir *C700* was visually observed to have slightly higher cover in the field  
261 (manufacturing variability). This might lead to higher retention of rainfall water, but because of lower contact with  
262 the soil due to its rigidity, the erosion rate of plot with coir was higher than for jute. Other explanation might be  
263 that due to the structure of fibers, water flows slower through coir than through jute. Additionally, coir fibers create  
264 higher obstacles for overland flow due to its larger diameter and also the clogging of spaces among fibers.  
265 Therefore, at coir *C700* plot the water runoff was lower but the sediment content was higher Further investigation  
266 of the interactions between eroded soil particles and GTX fibers during rainfall events would be valuable to test  
267 this theory. According to this experiment, it seems that slope gradient is not the only factor determining GTX  
268 performance. Soil characteristics and GTX-soil interface need to be considered along with the slope gradient.

269 The field experiment was carried out on a steeper slope (27°) than the laboratory experiment (9°). Authors  
270 proceeded to compare these two datasets because, according to some studies, GTX effectiveness increases with  
271 the slope gradient (Morgan et al. 2005). This fact was partly confirmed by Álvarez-Mozos et al. (2014), who  
272 examined the impact of GTX on runoff volume and soil loss on 45° and 60° slope. On 45° slope the soil loss was  
273 reduced by 69 % and 90 % by jute and coir, respectively. On 60° slope, the reduction was 60 % for jute and 56 %  
274 for coir. Again, different behaviour (performance ranking) was recorded with changing slope which makes the  
275 need of finding slope gradient threshold values beyond which the performance of GTX changes. In this study it is  
276 not possible to determine whether the soil erosion control performance increased in the field as “no-soil” conditions  
277 were used in the laboratory. Furthermore, without any other field records from lower slope gradient and same soil  
278 conditions to be compared with, it would be highly complicated to separate erosion control effect of GTX from  
279 the impact of soil infiltration on soil loss in the field. Also lower rainfall intensity applied in the field for operational  
280 reasons, might slightly modify the results. But for a pilot research on whether the performance ranking of GTX is  
281 the same in the field and in the laboratory, this deviation might be acceptable. For further research more consistent  
282 conditions definitely would be required, but the data presented here can shed more light on the behaviour of GTX  
283 under different site conditions.

284 **5 Conclusion**

285 Jute and coir geotextiles tested in this study can significantly delay the initiation of surface runoff under the  
286 simulated rainfall, when compared to control plots (bare soil in the field, impermeable plastic film in the  
287 laboratory) without GTX. Control plots tended to produce significantly higher runoff volume [L], discharge [L.s-  
288 1] and soil loss [g.] than GTX-treated plots.

289 In the laboratory, jute *J500* showed increasing trend of runoff control, unlike coir GTX, the performance of which  
290 gradually decreased. Further investigation is needed to prove whether this behavior appears also in the field.

291 Regardless the conditions (slope, laboratory vs field), coir *C400* showed to be less effective than jute *J500* and  
292 *C700*. The runoff control performance of jute *J500* and coir *C700* significantly differed between the “no-soil”  
293 laboratory and field conditions, but all GTX provided a great reduction of soil loss with jute *J500* being the most  
294 effective followed by coir *C700* and *C400*. The theory that soil would influence the performance of all GTX  
295 equally (same effectiveness ranking in the laboratory as in the field) was not confirmed, which makes the need of  
296 finding slope gradient threshold values beyond which the performance of GTX changes. Influence of the slope  
297 gradient and soil-GTX contact on runoff and soil loss reduction still need to be investigated in detail. Another  
298 experimental testing of GTX effectiveness using different slope gradient and soil subgrade is suggested by authors.



299 **6 Author contribution**

300 J. Kalibová designed the experiments and carried them out together with J. Petrů. L. Jačka performed laboratory  
301 and statistical analyses. J Kalibová prepared the manuscript with contributions from all co-authors.

302 **7 Data availability**

303 The data are publicly accessible.

304 **8 Acknowledgement**

305 This experiment was supported by the Internal Grant Agency of Czech University of Life Sciences Prague, grant  
306 IGA 20144225. The authors are grateful to their colleagues from the Faculty of Environmental Sciences, who  
307 helped with fieldwork.

308 **9 References**

- 309  
310 Álvarez-Mozos, J., Abad, E., Giménez, R., Campo, M. A., Goñi, M., Arive, M., Casali, J., Díez, J., Diego, I.:  
311 Evaluation of erosion control geotextiles on steep slopes. Part 1: Effects of runoff and soil loss, *Catena*, 118,  
312 168-178, doi: 10.1016/j.catena.2013.05.018, 2014.
- 313 [ASTM: Standard test methods for moisture, ash, and organic matter of peat and other organic soils. Method D](#)  
314 [2974-00. American Society for Testing and Materials. West Conshohocken, Pennsylvania, 2000.](#)
- 315 [Berendse, F., van Ruijven, J., Jongejans, E., Keesstra, S.: Loss of plant species diversity reduces soil erosion](#)  
316 [resistance. \*Ecosystems\*, 18 \(5\), 881-888, doi: 10.1007/s10021-015-9869-6, 2015.](#)
- 317 Beven, K. J.: *Rainfall-runoff modelling: the primer*, John Wiley & Sons, 449 pp., ISBN: 978-0-470-71459-1,  
318 2011.
- 319 Bhattacharyya, R., Smets, T., Fullen, M. A., Poesen, J., Booth, C. A.: Effectiveness of geotextiles in reducing  
320 runoff and soil loss: A synthesis, *Catena*, 81, 184-195, doi: 10.1016/j.catena.2010.03.003, 2010.
- 321 [Brevik, E. C., Cerdà, A., Mataix-Solera, J., Pereg, L., Quinton, J. N., Six, J., and Van Oost, K.: The](#)  
322 [interdisciplinary nature of SOIL. \*SOIL\*, 1, 117-129, doi: 10.5194/soil-1-117-2015, 2015.](#)
- 323 Cantón, Y., Solé-Benet, A., de Vente, J., Boix-Fayos, C., Calvo-Cases, A., Asensio, C., Puigdefábregas, J.:  
324 A review of runoff generation and soil erosion across scales in semiarid south-eastern Spain. *J. Arid*  
325 *Environ.*, 75, 1254-1261, doi: 10.1016/j.jaridenv.2011.03.004, 2011.
- 326 Cerdà, A., Giménez-Morera, A., Bodí, M. B.: Soil and water losses from new citrus orchards growing on sloped  
327 soils in the western Mediterranean basin. *Earth Surf. Process. Landforms*, 34, 1822-1830, doi:  
328 10.1002/esp.1889, 2009
- 329 Cerdà, A., Jurgensen, M.: The influence of ants on soil and water losses from an orange orchard in eastern Spain.  
330 *J. Appl. Entomol.-Zeitschrift für Angewandte Entomologie*, 132 (4), 306-314, doi: 10.1111/j.1439-  
331 0418.2008.01267.x, 2008
- 332 Cerdà, A., Lavee, H., Romero-Díaz, A., Hooke, J., Montanarella, L.: Soil erosion and degradation in  
333 mediterranean type ecosystems. *Land Degrad. Dev.*, 21 (2), 71-74, doi: 10.1002/ldr.968, 2010.
- 334 Cerdà, A.: Effect of climate on surface flow along a climatological gradient in Israel: A field rainfall simulation  
335 approach, *J. Arid Environ.*, 38 (2), 145-159, doi: 10.1006/jare.1997.0342, 1998.
- 336 [Cerdà, A.: Effect of climate on surface flow along a climatological gradient in Israel: A field rainfall simulation](#)  
337 [approach. \*J Arid Environ\*, 38 \(2\), 145-159, doi: 10.1006/jare.1997.0342, 1998.](#)
- 338 Cerdà, A.: Soil water erosion on road embankments in eastern Spain, *Sci. Total Environ.*, 378 (1-2), 151-155,  
339 doi: 10.1016/j.scitotenv.2007.01.041, 2007.
- 340 Chen, S. C., Chang, K. T., Wang, S. H., Lin, J. Y.: The efficiency of artificial materials used for erosion control  
341 on steep slopes. *Earth Sci. and Environ.*, 62, 197-206, doi: 10.1007/s12665-010-0514-6, 2011.
- 342 Davies, K., Fullen, M. A., Booth, C. A.: A pilot project on the potential contribution of palm-mat geotextiles to  
343 soil conservation. *Earth Surf. Process. Landf.*, 31, 561-569, doi: 10.1002/esp.1349, 2006.
- 344 [Decock, C., Lee, J., Nepalova, M., Pereira, E. I. P., Tendall, D. M., Six, J.: Mitigating N2O emissions from soil:](#)  
345 [from patching leaks to transformative action. \*SOIL\*, 1, 687-694, doi:10.5194/soil-1-687-2015, 2015.](#)
- 346 Erkossa, T., Wudneh, A., Desalegn, B., Taye, G.: Linking soil erosion to on-site financial cost: Lessons from  
347 watersheds in the Blue Nile basin, *Solid Earth*, 6 (2), 765-774, doi: 10.5194/se-6-765-2015, 2015.
- 348 Fifield, J. S.: How effective are erosion control products in assisting with dryland grass establishment with no  
349 irrigation? Proceedings of the XXIII th IECA Annual Conference „The environment is our future“, Reno,  
350 Nevada, February 1992, 321-334, 1992.
- 351 Fullen, M. A., Booth, C. A., Sarsby, R. W., Davies, K., Kugan, R., Bhattacharyya, R., Subedi, M., Poesen, J.,  
352 Smets, T., Kertész, Á., Tóth, A., Szalai, Z., Jakab, G., Kozma, K., Jankauskas, B., Jankauskiene, G.,  
353 Bühmann, C., Paterson, G., Mulibana, E., Nell, J. P., van der Merwe, G. M. E., Guerra, A. J.T., Mendonça,  
354 J. K. S., Guerra, T. T., Sathler, R., Bezerra, J. F. R., Peres, S. M., Yi, Z., Yongmei, L., Li, T.,  
355 Panomtarachichigul, M., Peukrai, S., Thu, D. C., Cuong, T. H., Toan, T. T., Jonsyn-Ellis, F., Jallow, S., Cole,  
356 A., Mulholland, B., Dearlove, M., Corkill, C.: Contributions of biogeotextiles to sustainable development and  
357 soil conservation in developing countries: the BORASSUS Project. In: *Ecosyst. Sustain. Dev.* WIT Press,  
358 Southampton (UK), 123-141, 2007.
- 359 [Gee, G. W.; Bauder, J. W.: Particle Size Analysis by Hydrometer: A Simplified Method for Routine Textural](#)  
360 [Analysis and a Sensitivity Test of Measurement Parameters. \*Soil Sci Soc Am J\*, 43 \(5\), 383-411, doi:](#)  
361 [10.2136/sssaj1979.03615995004300050038x, 1979.](#)
- 362 Giménez-Morera, A., Ruiz Sinoga, J.D., Cerdà, A.: The impact of cotton geotextiles on soil and water losses  
363 from mediterranean rainfed agricultural land. *Land Degrad. Dev.*, 21 (2), 210-217. doi: 10.1002/ldr.971,  
364 2010.

365 Gosh, S. K.: A Review on Jute Geotextile and its Geo-Technical Applications with respect to Environmental  
366 Concern. International Journal of Innovative Research in Science & Engineering ISSN [Online] URL.  
367 <http://ijirse.in/docs/Dec13/IJRSE1607.pdf>. Cited: 12/01/2015., 2014.

368 Harmon, R. S., Doe, W. W. (Eds.): Landscape Erosion and Evolution Modeling, Kluwer, New York, 540 pp.  
369 ISBN: 0-306-46718-6, 2001.

370 Hu, Y. - L., Niu, Z. -X., Zeng, D. -H., Wang, C. -Y.: Soil Amendment Improves Tree Growth and Soil Carbon  
371 and Nitrogen Pools in Mongolian Pine Plantations on Post-Mining Land in Northeast China. Land Degrad.  
372 Dev., 26 (8), 807-812, doi: 10.1002/ldr.2386, 2015.

373 Hueso-González, P., Martínez-Murillo, J. F., Ruiz-Sinoga, J. D.: The impact of organic amendments on forest  
374 soil properties under Mediterranean climatic conditions. Land Degrad. Dev., 25(6), 604-612, doi:  
375 10.1002/ldr.2150, 2014.

376 Ingold, T. S., Thomson, J. C.: Results of current research of synthetic and natural fiber erosion control systems.  
377 Erosion Control: Proceedings of Conference XVII, International Erosion Control Association, 17–28  
378 February, Dallas, Texas, 65–73, 1986.

379 [Iserloh, T., Ries, B. J., Cerdà, A., Echeverría, M. T., Fister, W., Geißler, C., Kuhn, N. J., León, F. J., Peters, P.,  
380 Schindewolf, M., Schmidt, J., Scholten, T., Seeger, M.: Comparative measurements with seven rainfall s  
381 simulators on uniform bare fallow land. Z Geomorphol, 57 \(1\), 1-10, doi: 10.1127/0372-8854/2012/S-00085,  
382 2013a.](#)

383 [Iserloh, T., Ries, J. B., Arnáez, J., Boix-Fayos, C., Butzen, V., Cerdà, A., Echeverría, M. T., Fernández-Gálvez,  
384 J., Fister, W., Geißler, C., Gómez, J.A., Gómez-Macpherson, H., Kuhn, N. J., Lázaro, R., León, F. J.,  
385 Martínez-Mena, M., Martínez-Murillo, J. F., Marzen, M., Mingorance, M. D., Ortigosa, L., Peters, P.,  
386 Regüés, D., Ruiz-Sinoga, J. D., Scholten, T., Seeger, M., Solé-Benet, A., Wengel, R., Wirtz, S. European  
387 small portable rainfall simulators: A comparison of rainfall characteristics. Catena, 110, 100-112, doi:  
388 10.1016/j.catena.2013.05.013, 2013b.](#)

389 Jakab, G., Szalai, Z., Kertész, Á., Tóth, A., Madarász, B., Szabó, S.: Biological geotextiles against soil  
390 degradation under subhumid climate – a case study. Carpathian J. Earth Environ. Sci., 7 (2), 125-134, 2012.

391 [Keesstra, S., Pereira, P., Novara, A., Brevik, E.C., Azorin-Molina, C., Parras-Alcántara, L., Jordán, A., Cerdà,  
392 A.: Effects of soil management techniques on soil water erosion in apricot orchards. Sci. Total Environ., 551-  
393 552, 357-366. doi: 10.1016/j.scitotenv.2016.01.182, 2016.](#)

394 Keesstra, S., Pereira, P., Novara, A., Brevik, E.C., Azorin-Molina, C., Parras-Alcántara, L., Jordán, A., Cerdà,  
395 A.: Effects of soil management techniques on soil water erosion in apricot orchards. Sci Total Environ, 357-  
396 366, doi: <http://dx.doi.org/10.1016/j.scitotenv.2016.01.182>, 2016.

397 [Keesstra, S.D., Geissen, V., van Schaik, L., Mosse, K., Piirinen, S.: Soil as a filter for groundwater quality.  
398 Current Opinions in Environmental Sustainability 4, 507-516, doi:10.1016/j.cosust.2012.10.007, 2012.](#)

399 Keesstra, S.D., Maroulis, J., Argaman, E., Voogt, A., Wittenberg, L.: Effects of controlled fire on hydrology and  
400 erosion under simulated rainfall. Cuader. Invest. Geográf., 40, 269-293, doi: 10.18172/cig.2532, 2014.

401 Kertész, A., Toth, A., Szalai, Z., Jakab, G., Kozma, K., Booth, C. A., Fullen, M. A., Davies K.: Geotextile as a  
402 tool against soil erosion in vineyards and orchards. In: Kungolas, A., Brebbia, C. A., Beriatos, E. (Eds.):  
403 Sustainable Development and Planning III, Vol. 2, WIT Press, Southampton, UK, 611–619, 2007.

404 Khan, A. J., Binoy, T. H.: Top Soil Erosion Control Using Geojute,. Proceedings of International Conference on  
405 Advances in Civil Engineering, Delhi, India. 28 – 29 December, 146-150, 2012.

406 [Kutílek, M., Nielsen, D.R.: Soil Hydrology, Catena Verlag, Cremlingen, Destedt, Germany, 370 pp, ISBN 3-  
407 923381-26-3, 1994.](#)

408 Langford, R. L., Coleman, M. J.: Biodegradable erosion control blankets prove effective on Iowa wildlife refuge.  
409 Proceedings of XXVII th International Erosion Control Association Conference, Seattle, USA, March 1996,  
410 13 – 20, 1996.

411 Lekha, K. R.: Field instrumentation and monitoring of soil erosion in coir geotextile stabilized slopes – A case  
412 study, Geotext. Geomembr., 22, 399-413, doi: 10.1016/j.geotextmem.2003.12.003, 2004.

413 Lieskovský, J., Kenderessy, P.: Modelling the effect of vegetation cover and different tillage practices on soil  
414 erosion in vineyards: A case study in vrábľa (Slovakia) using WATEM/SEDEM Land Degrad. Dev., 25 (3),  
415 288-296, doi: 10.1002/ldr.2162, 2014.

416 Luo, H., Zhao, T., Dong, M., Peng, X., Guo, Y., Wang, Z., Liang, C.: Field studies on the effect of three  
417 geotextiles on runoff and erosion of road slope in Beijing, China. Catena, 109, 150-156, doi:  
418 10.1016/j.catena.2013.04.004, 2013.

419 [Martínez-Murillo, J. F., Nadal-Romero, E., Regüés, D., Cerdà, A., Poesen, J.: Soil erosion and hydrology of the  
420 western Mediterranean badlands throughout rainfall simulation experiments: A review. Catena, 106, 101-  
421 112, doi: 10.1016/j.catena.2012.06.001, 2013.](#)

422 Midha, V. K., Suresh Kumar, S.: Influence of woven structure on coir rolled erosion-control products. Geosynth.  
423 Internation., 20 (6), 396-407, doi: 10.1680/gein.13.0027, 2013.

424 Mitchell, D. J., Barton, A. P., Fullen, M. A., Hocking, T. J., Zhi, W. B., Yi, Z.: Field studies of the effects of jute  
425 geotextiles on runoff and erosion in Shropshire, UK. *Soil Use Managem.*, 19, 182-184, doi: 10.1111/j.1475-  
426 2743.2003.tb00301.x, 2003.

427 Moreno-Ramón, H., Quízembe, S.J., Ibáñez-Asensio, S.: Coffee husk mulch on soil erosion and runoff:  
428 Experiences under rainfall simulation experiment, *Solid Earth*, 5 (2), 851-862, doi: 10.5194/se-5-851-2014,  
429 2014.

430 Morgan, R. C. P.: *Soil Erosion and Conservation* (third edition), Blackwell Publishing, Oxford, UK, 304 pp.,  
431 2005.

432 Morgan, R. P. C., Rickson, R. J. (Eds.): *Slope Stabilization and Erosion Control: A Bioengineering Approach*  
433 Morgan. E & FN SPON, Cranfield, UK, 274 pp., 1995.

434 [Nelson, D.W., Sommers L. E.: Total carbon, organic carbon, and organic matter. In: Page A. L., Miller. R. H.,](#)  
435 [Keeney, D. R. \(eds.\): Methods of Soil Analysis, Part 2, Second Edition, Agronomy, 9, 539-580, Am. Soc. of](#)  
436 [Agron., Inc. Madison, Wisconsin, 1982.](#)

437 Ogbobe, O., Essien, K. S., Adebayo, A.: A study of biodegradable geotextiles used for erosion control.  
438 *Geosynth, Internation*, 5 (5), 545-553, doi: 10.1680/gein.5.0131, 1998.

439 [Ola, A., Dodd, I.C., Quinton, J.N.: Can we manipulate root system architecture to control soil erosion? \*Soil\*, 1,](#)  
440 [603-612. doi: 10.5194/soil-1-603-2015. 2015.](#)

441 Pereira, P., Giménez-Morera, A., Novara, A., Keesstra, S., Jordán, A., Masto, R. E., Brevik, E., Azorin-Molina,  
442 C., Cerdà, A.: The impact of road and railway embankments on runoff and soil erosion in eastern Spain.  
443 *Hydrol. Earth Syst. Sci. Discuss.*, 12, 12947-12985, doi:10.5194/hessd-12-12947-2015, 2015.

444 Prosdociami, M., Jordán, A., Tarolli, P., Keesstra, S., Novara, A., Cerdà, A.: The immediate effectiveness of  
445 barley straw mulch in reducing soil erodibility and surface runoff generation in Mediterranean vineyards. *Sci*  
446 *Total Environ*, 547, 323-330, doi: 10.1016/j.scitotenv.2015.12.076, 2016.

447 Rickson, R. J.: Controlling sediment at source: an evaluation of erosion control geotextiles. *Earth Surf. Process.*  
448 *Landf.*, 31, 550-560, doi: 10.1002/esp.1368, 2006.

449 Rickson, R. J.: Management of sediment production and prevention in river catchments: A matter of scale? In:  
450 Owens, P. N., Collins, A. J. (Eds.): *Soil Erosion and Sediment Redistribution in River Catchments:*  
451 *Measurement, Modelling and Management*, CAB International, Wallingford, UK, 228 – 238, 2005.

452 Rickson, R. J.: The use of geotextiles for soil erosion control, Ph. D. thesis, Cranfield University, Cranfield, UK,  
453 295 pp., 2000.

454 Rickson, R. J.: The use of geotextiles in soil erosion control: comparison of performance on two soils. In:  
455 Rimwanich, S., (Ed.): *Proceedings of Land Conservation for Future Generations, V. International Soil*  
456 *Conservation, Bangkok, Thailand, January 1998*, 961-970, 1988.

457 [Rodrigo Comino, J., Brings, C., Lassu, T., Iserloh, T., Senciales, J. M., Martínez Murillo, J.F., Ruiz Sinoga, J.](#)  
458 [D., Seeger, M., Ries, J. B.: Rainfall and human activity impacts on soil losses and rill erosion in vineyards](#)  
459 [\(Ruwer Valley, Germany\). \*Solid Earth\*, 6, 823-837, doi: 10.5194/se-6-823-2015, 2015.](#)

460 [Rodrigo Comino, J., Iserloh, T., Morvan, X., Malam Issa, O., Naisse, C., Keesstra, S. D., Cerdà, A., Prosdociami,](#)  
461 [M., Arnáez, J., Lasanta, T., Ramos, M. C., Marqués, M. J., Ruiz Colmenero, M., Bienes, R., Ruiz Sinoga, J.](#)  
462 [D., Seeger, M., Ries, J. B.: Soil Erosion Processes in European Vineyards: A Qualitative Comparison of](#)  
463 [Rainfall Simulation Measurements in Germany, Spain and France. \*Hydrology\*, 3 \(1\), 6,](#)  
464 [doi:10.3390/hydrology3010006, 2016.](#)

465 Sadeghi, S. H. R., Gholami, L., Sharifi, E., Khaledi Darvishan, A., Homae, M.: Scale effect on runoff and soil  
466 loss control using rice mulch under laboratory conditions, *Solid Earth*, 6 (1), 1-8. doi: 10.5194/se-6-1-2015,  
467 2015.

468 [Schumacher, B. A.: Methods for the determination of the total organic carbon \(TOC\) in soils and sediments. U.S.](#)  
469 [Environmental Protection Agency, 1- 23, Washington DC, 2002.](#)

470 Seutloali, K.E., Beckedahl, H. R.: Understanding the factors influencing rill erosion on roadcuts in the south  
471 eastern region of South Africa, *Solid Earth*, 6 (2), 633-641, doi: 10.5194/se-6-633-2015, 2015.

472 Shao, Q., Gu, W., Dai, Q., Makoto, S., Liu, Y.: Effectiveness of geotextile mulches for slope restoration in semi-  
473 arid northern China. *Catena*, 116, 1-9, doi: 10.1016/j.catena.2013.12.006, 2014.

474 [SIST-TS CEN ISO/TS 17892-4:2004: Geotechnical Investigation and Testing – Laboratory Testing of Soil –](#)  
475 [Part 4: Determination of Particle Size Distribution \(ISO/TS 17892-4:2004\). Inštitut za standardizacijo,](#)  
476 [Slovenija, 2004.](#)

477 Smets, T., Poesen, J., Bhattacharyya, R., Fullen, M. A., Subedi, M., Booth, C. A., Kertesz, A., Szalai, Z., Toth,  
478 A., Jankauskiene, G., Guerra, A. J. T., Bezerra, J. F. R., Yi, Z., Panomtaranichagul, M., Buhmann, C.,  
479 Paterson, G.: Evaluation of biological geotextiles for reducing runoff and soil loss under various  
480 environmental conditions using laboratory and field plot data. *Land Degrad. Dev*, 22, 480-494, doi:  
481 10.1002/ldr.1095, 2011.

482 [Smith, P., Cotrufo, M. F., Rumpel, C., Paustian, K., Kuikman, P. J., Elliott, J. A., McDowell, R., Griffiths, R. I.,](#)  
483 [Asakawa, S., Bustamante, M., House, J. I., Sobocká, J., Harper, R., Pan, G., West, P. C., Gerber, J. S., Clark,](#)

484 [J. M., Adhya, T., Scholes, R. J., Scholes, M. C.: Biogeochemical cycles and biodiversity as key drivers of](#)  
485 [ecosystem services provided by soils. SOIL 1, 665-685. doi: 10.5194/soil-1-665-2015, 2015.](#)  
486 Stanchi, S., Falsone, G., Bonifacio, E.: Soil aggregation, erodibility, and erosion rates in mountain soils (NW  
487 Alps, Italy). *Solid Earth*, 6 (2), 403-414, doi: 10.5194/se-6-403-2015, 2015.  
488 Sutherland, R. A., Ziegler, A. D.: Effectiveness of coir-based rolled erosion control systems in reducing  
489 sediment transport from hillslopes. *Appl. Geogr.*, 27, 150-164, doi: 10.1016/j.apgeog.2007.07.011, 2007.  
490 Sutherland, R. A., Ziegler, A. D.: Hillslope runoff and erosion as affected by rolled erosion control systems: a  
491 field study. *Hydrol. Process.*, 20, 2839–2855, doi: 10.1002/hyp.6078, 2006.  
492 Thompson, A. M.: Shear stress partitioning for vegetation and erosion control blankets. Ph. D. thesis,  
493 Department of Biosystems and Agricultural Engineering, University of Minnesota, St. Paul, Minnesota (UMI  
494 Number: 3032015), 2001.  
495 Tolasz, R.: Atlas podnebí Česka: Climate Atlas of Czechia. 1st edition. Czech Hydrometeorological Institute,  
496 Prague, Czech Republic, 255 pp., 2007.  
497 Toy, T. J., Hadley, R. F.: Geomorphology and reclamation of disturbed lands. *Earth Surf. Process. Landf.*, 14  
498 (8), 754-755, 1987.  
499 Weggel, J. R., Rustom, R.: Soil Erosion by Rainfall and Runoff – State of the Art. *Goetext. Geomembr.*, 11, 551-  
500 572, doi: 10.1016/0266-1144(92)90032-6, 1992.  
501 Yazdanpanah, N., Mahmoodabadi, M., and Cerdà, A.: The impact of organic amendments on soil hydrology,  
502 structure and microbial respiration in semiarid lands. *Geoderma*, 266, 58–65, doi:  
503 10.1016/j.geoderma.2015.11.032, 2016.  
504 [Yuan, Y., Jiang, Y., Taguas, E.V., Mbonimpa, E.G., Hu, W.: Sediment loss and its cause in Puerto Rico](#)  
505 [watersheds. Soil, 1, 595-602. doi: 10.5194/soil-1-595-2015, 2015.](#)

**Table 1**

Overview of studies investigating the impact of *J500* jute (500 g.m<sup>-2</sup>) and *C400*, *C700* coir (400 g.m<sup>-2</sup>; 700 g.m<sup>-2</sup>) geotextiles on surface runoff and soil erosion by water since 2000\*.

| Author                        | GTX type                  | Soil type (sand - silt - clay; %)    | Slope [°] | Simulated rainfall intensity [mm h <sup>-1</sup> ] | control sample cover type | runoff reduction [% of control] | Soil loss reduction [% of control] | Lab./ Field [L/F] |
|-------------------------------|---------------------------|--------------------------------------|-----------|----------------------------------------------------|---------------------------|---------------------------------|------------------------------------|-------------------|
| Álvarez-Mozos et al. (2014)   | <i>J500</i>               | silty clay loam (13.8 - 53.9 - 32.3) | 45°       | max. 31.2                                          | hydroseeded soil          | <b>266</b>                      | 31                                 | F                 |
|                               | <i>J500</i>               | silty clay loam (13.8 - 53.9 - 32.3) | 60°       | max. 31.3                                          | hydroseeded soil          | <b>238</b>                      | 40                                 | F                 |
| Shao et al. (2014)            | <i>J500</i>               | mixed substrate                      | 40°       | 50                                                 | bare substrate            | 37.9                            | 0.3                                | L                 |
| Khan et al. (2012)            | <i>J500</i>               | sandy                                | 33°       | 122                                                | bare soil                 | 83                              | 10                                 | L                 |
| Jakab et al. (2012)           | <i>J500</i>               | silty loam (23 - 70 - 7)             | 8.5°      | max. 38.7                                          | bare soil                 | 47, 74, <b>119</b>              | 20                                 | F                 |
| Kertész et al. (2007)         | <i>J500</i>               | silty loam                           | 11°       | max. 83                                            | bare soil                 | 30 - <b>250</b>                 | 7 - <b>306</b>                     | F                 |
| Sutherland and Ziegler (2007) | <i>C700</i>               | clay (24 - 34 - 42)                  | 5.5°      | 35                                                 | bare soil                 | 84                              | 0.4                                | F                 |
|                               | <i>C400</i>               | clay (24 - 34 - 42)                  | 5.5°      | 35                                                 | bare soil                 | 90                              | 8                                  | F                 |
| Rickson (2006)                | <i>J500</i>               | sandy loam                           | 10°       | 72                                                 | bare soil                 | <b>102</b>                      | 15                                 | L                 |
| Sutherland and Ziegler (2006) | <i>C700</i>               | sandy loam                           | 10°       | 72                                                 | bare soil                 | <b>106</b>                      | 51                                 | L                 |
|                               | <i>J500</i> , <i>C700</i> | clay-dominated oxisol                | 5.5°      | 35, 114                                            | bare soil                 | <b>91 - 104</b>                 | 17                                 | F                 |
| Lekha (2004)                  | <i>C700</i>               | sandy loam                           | 26°       | NA**                                               | seeded bare soil          | NA**                            | 0.4 - 21.9                         | F                 |
| Mitchel et al. (2003)         | <i>J500</i>               | loamy sand                           | 15°       | NA**                                               | bare soil                 | 35                              | 1                                  | F                 |
| Rickson (2000)                | <i>J500</i>               | sandy loam                           | 10°       | 35                                                 | bare soil                 | 90                              | 14                                 | L                 |
|                               | <i>C700</i>               | sandy loam                           | 10°       | 35                                                 | bare soil                 | 97                              | 25                                 | L                 |
|                               | <i>J500</i>               | sandy loam (68.1 - 22.1 - 9.8)       | 10°       | 95                                                 | bare soil                 | 90                              | 23                                 | L                 |
|                               | <i>C700</i>               | sandy loam (68.1 - 22.1 - 9.8)       | 10°       | 95                                                 | bare soil                 | 102                             | 23                                 | L                 |

\*For studies carried out before the year 2000, see the papers of Bhattacharyya et al. (2010) or Ingold and Thompson (1986).

\*\*NA = not available

**Table 2**

Main characteristics of three tested biological GTX.

| Treatment                            | 1 - Jute net                                                 | 2 - Coir net                                                 | 3 - Coir net                                                 |
|--------------------------------------|--------------------------------------------------------------|--------------------------------------------------------------|--------------------------------------------------------------|
| Marking                              | <i>J500</i>                                                  | <i>C400</i>                                                  | <i>C700</i>                                                  |
| Material                             | 100% jute fiber                                              | 100% coir fiber                                              | 100% coir fiber                                              |
| Description                          | open weave biodegradable jute geotextile in a grid structure | open weave biodegradable coir geotextile in a grid structure | open weave biodegradable jute geotextile in a grid structure |
| Mass per area (g.m <sup>-2</sup> )   | 500                                                          | 400                                                          | 700                                                          |
| Mesh size (mm × mm)                  | 15 × 15                                                      | 35 × 35                                                      | 20 × 20                                                      |
| Thickness (mm)                       | 2                                                            | 7                                                            | 8                                                            |
| Open area (%)                        | 60                                                           | 65                                                           | 50                                                           |
| Working life (years)                 | 1 - 2                                                        | 3 - 4                                                        | 3 - 7                                                        |
| Average price (EUR/m <sup>2</sup> )* | 0.61 – 0.96                                                  | 0.89 – 1.29                                                  | 1.29 – 2.09                                                  |

\* Data obtained from several GTX suppliers.

**Table 3**

Main laboratory rainfall characteristics measures by Laser Precipitation Monitor.

| Mean intensity          | Time-specific kinetic energy                          | Volume-specific kinetic energy             | Median volumetric drop diameter | Christiansen Uniformity |
|-------------------------|-------------------------------------------------------|--------------------------------------------|---------------------------------|-------------------------|
| I [mm.h <sup>-1</sup> ] | KE <sub>R</sub> [J.m <sup>-2</sup> .h <sup>-1</sup> ] | KE [J .m <sup>-2</sup> .mm <sup>-1</sup> ] | d <sub>50</sub> [mm]            | CU [%]                  |
| 105                     | 1269                                                  | 12                                         | 0.44                            | 79                      |



**Table 4**

An outline of laboratory and field experiments testing the impact of biological GTX on surface runoff and soil loss.

|                                          | Laboratory experiments   | Field experiments       |
|------------------------------------------|--------------------------|-------------------------|
| Substrate type                           | impermeable plastic film | gravelly loam           |
| Slope (°)                                | 9                        | 27                      |
| Rainfall intensity (mm.h <sup>-1</sup> ) | 105                      | 80                      |
| Experiment duration (min)                | 15                       | 15                      |
| Cover type                               | <i>J500, C400, C700</i>  | <i>J500, C400, C700</i> |
| Control cover                            | impermeable plastic film | bare gravelly loam      |
| Replications                             | 10                       | 3                       |
| Total number of experiments              | 40                       | 12                      |

**Table 5**

Statistical description of peak discharge for 500 g.m<sup>-2</sup> jute net (*J500*), 400 g.m<sup>-2</sup> coir net (*C400*), and 700 g.m<sup>-2</sup> coir net (*C700*); laboratory experiments.

| Parameters               | Units             | Control | <i>J500</i> | <i>C400</i> | <i>C700</i> |
|--------------------------|-------------------|---------|-------------|-------------|-------------|
| Arithmetic mean          | L.s <sup>-1</sup> | 0.151   | 0.126       | 0.146       | 0.137       |
| Standard deviation       | L.s <sup>-1</sup> | 0.0005  | 0.0076      | 0.0025      | 0.0015      |
| Median                   | L.s <sup>-1</sup> | 0.151   | 0.126       | 0.145       | 0.138       |
| Minimum                  | L.s <sup>-1</sup> | 0.150   | 0.117       | 0.143       | 0.135       |
| Maximum                  | L.s <sup>-1</sup> | 0.150   | 0.140       | 0.150       | 0.139       |
| Range                    | L.s <sup>-1</sup> | 0.001   | 0.023       | 0.007       | 0.004       |
| Coefficient of variation | %                 | 0.004   | 0.058       | 0.017       | 0.011       |
| CI mean 0.95*            | L.s <sup>-1</sup> | 0.0004  | 0.0056      | 0.0019      | 0.0011      |

\*The confidence interval of the mean calculated at the 0.95 significance level.

**Table 6**

Mean runoff ratios  $RR_{15}$  [%], peak discharge ratios QR [%] and soil loss SLR [%] ratios of jute  $500 \text{ g.m}^{-2}$  (*J500*), coir  $400 \text{ g.m}^{-2}$  (*C400*) and coir  $700 \text{ g.m}^{-2}$  (*C700*) GTX, compared to control treatments under field and laboratory conditions.

|       | mean runoff ratio $RR_{15}$ |             |             |             | mean peak discharge ratio QR |             |             |             | mean soil loss ratio SLR |             |             |             |
|-------|-----------------------------|-------------|-------------|-------------|------------------------------|-------------|-------------|-------------|--------------------------|-------------|-------------|-------------|
|       | [%]                         |             |             |             | [%]                          |             |             |             | [%]                      |             |             |             |
|       | control                     | <i>J500</i> | <i>C400</i> | <i>C700</i> | control                      | <i>J500</i> | <i>C400</i> | <i>C700</i> | control                  | <i>J500</i> | <i>C400</i> | <i>C700</i> |
| lab.  | 100                         | 78          | 91          | 83          | 100                          | 83          | 97          | 91          | 100                      | -           | -           | -           |
| field | 100                         | 62          | 79          | 31          | 100                          | 74          | 87          | 37          | 100                      | 0.6         | 6.2         | 2.1         |

**Table 7**

Parameters (*t-value*, degree of freedom *df* and *p-value*) of the Welch Two Sample t-test; significance level 0.05.

|              | runoff $t_i$   |           |                        | runoff $R_{15}$ |           |                        | peak discharge $Q$ |           |                        |
|--------------|----------------|-----------|------------------------|-----------------|-----------|------------------------|--------------------|-----------|------------------------|
|              | <i>t-value</i> | <i>df</i> | <i>p-value</i>         | <i>t-value</i>  | <i>df</i> | <i>p-value</i>         | <i>t-value</i>     | <i>df</i> | <i>p-value</i>         |
| control×J500 | -16.53         | 10.42     | $8.18 \times 10^{-9}$  | 16.49           | 9.06      | $4.57 \times 10^{-8}$  | 9.98               | 8.08      | $8.00 \times 10^{-6}$  |
| control×C400 | -10.45         | 11.20     | $4.07 \times 10^{-7}$  | 25.28           | 9.79      | $3.02 \times 10^{-10}$ | 5.85               | 8.74      | $2.72 \times 10^{-4}$  |
| control×C700 | -23.15         | 18.00     | $7.63 \times 10^{-15}$ | 36.22           | 9.51      | $1.65 \times 10^{-11}$ | 26.10              | 10.07     | $1.40 \times 10^{-10}$ |
| J500×C700    | 7.64           | 10.42     | $1.38 \times 10^{-5}$  | -3.70           | 11.09     | 0.0034                 | -4.37              | 8.64      | 0.002                  |
| J500×C400    | 6.49           | 17.17     | $5.31 \times 10^{-6}$  | -9.11           | 10.34     | $2.93 \times 10^{-6}$  | -7.57              | 9.80      | $2.15 \times 10^{-5}$  |
| C700×C400    | -0.44          | 11.20     | <b>0.672</b>           | -7.57           | 9.80      | $2.15 \times 10^{-5}$  | 9.01               | 13.01     | $5.90 \times 10^{-7}$  |

**Figure 1**

Norton Ladder Rainfall Simulator above test beds with mechanical toggle flow metres. *C400* coir erosion control net spread in the test bed.

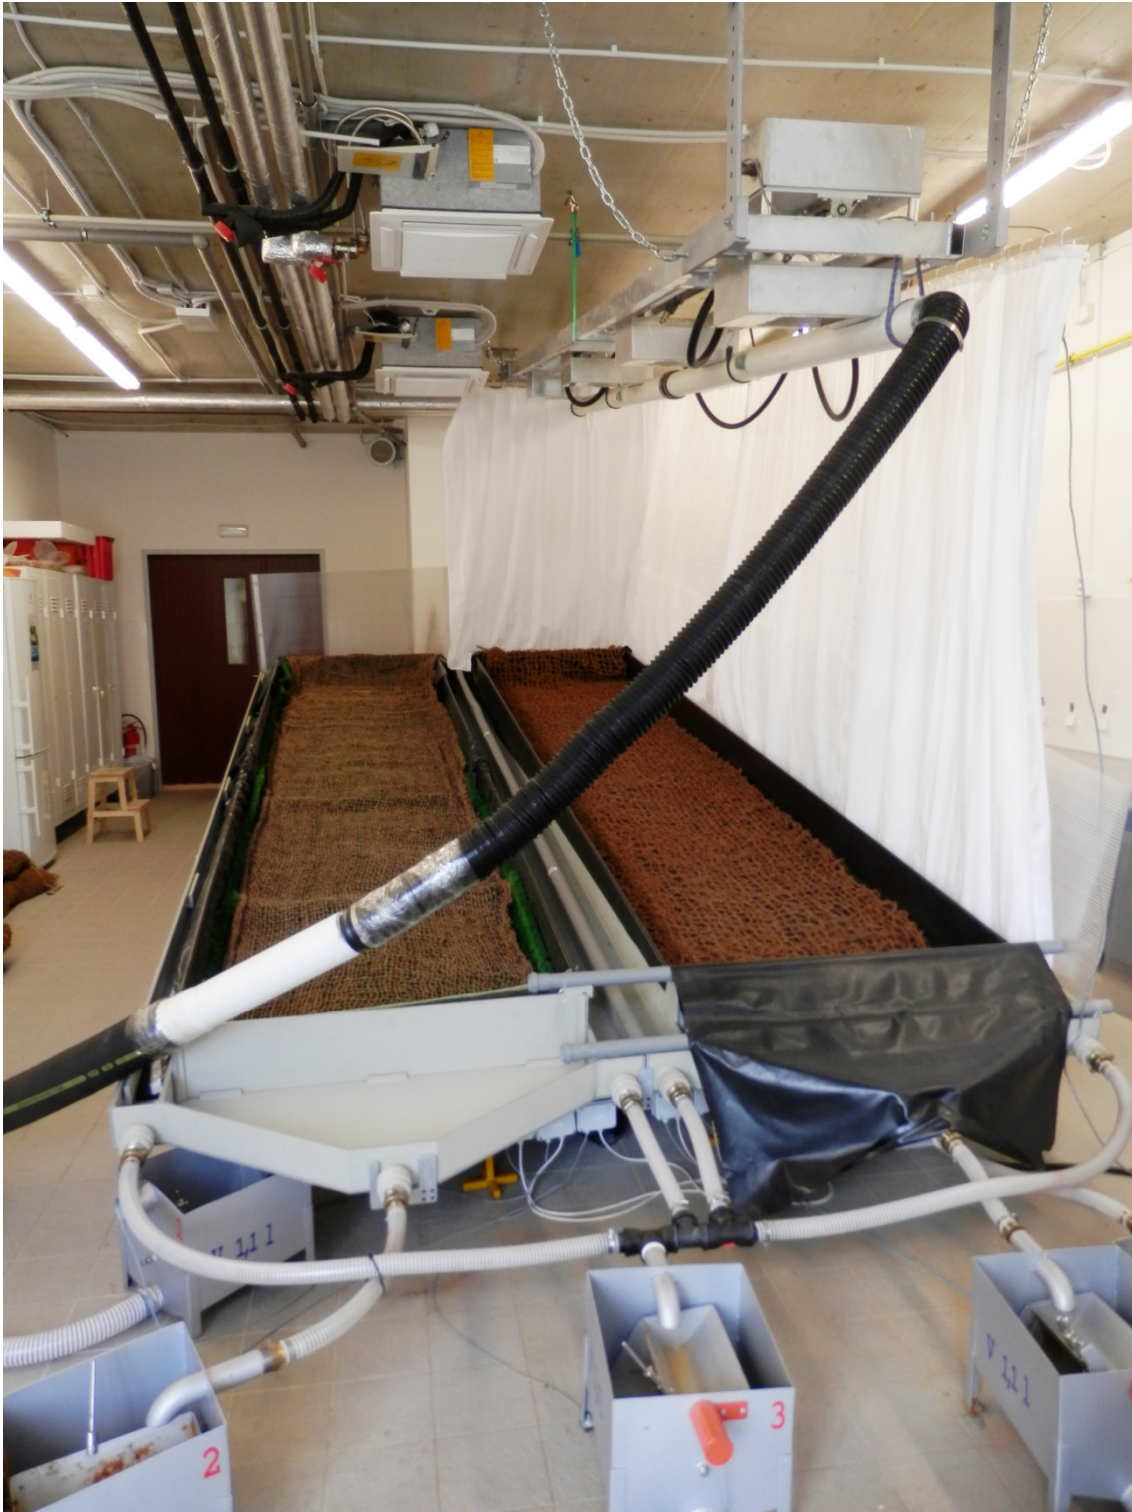

**Figure 2**

Experimental slope in the field (Rokycany, Czech Republic). Rainfall simulation on bare soil (control sample) in progress. Note: the iron collecting trough at the bottom of the plot is hidden below the eroded material as the figure was taken during the rainfall simulation.

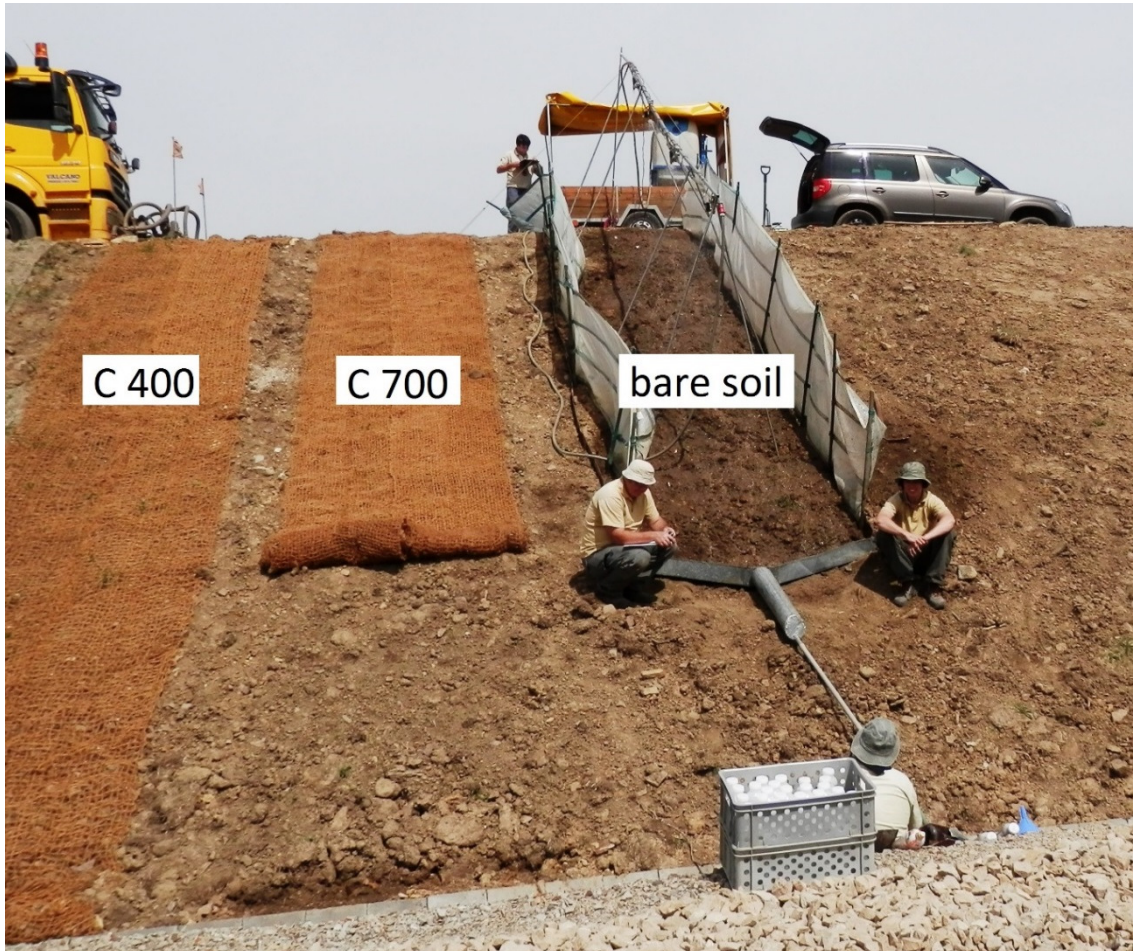



**Figure 3**

Surface runoff volume at time = 15 minutes,  $R_{15}$  (L); linear trend-lines included; laboratory conditions. For the data see supplementary Table S1.

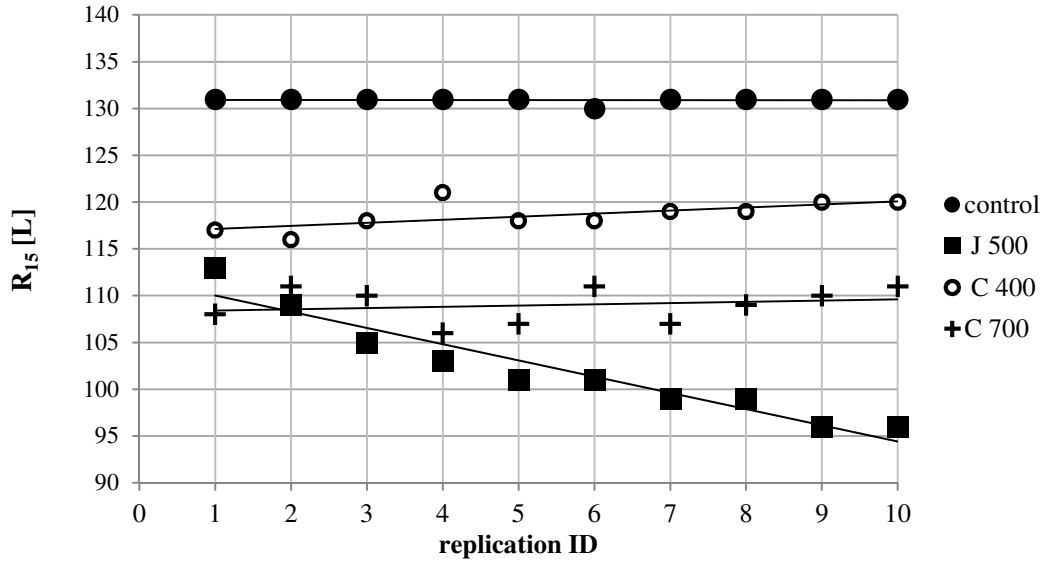

Colour version:

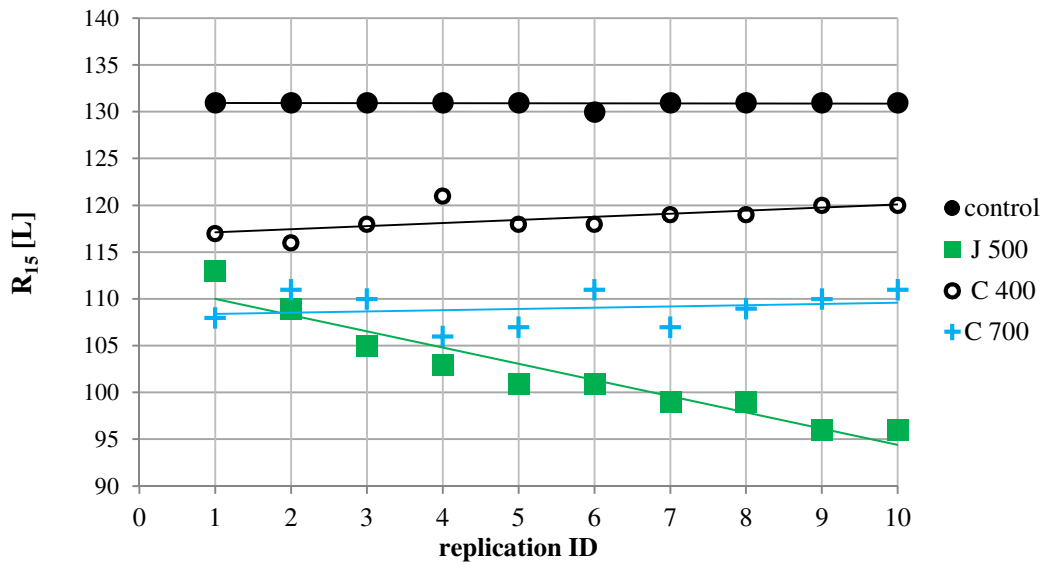

**Figure 4**

Peak discharge at outlet section,  $Q$  (L.s-1); linear trend-lines included; laboratory conditions. For the data see supplementary Table S2.

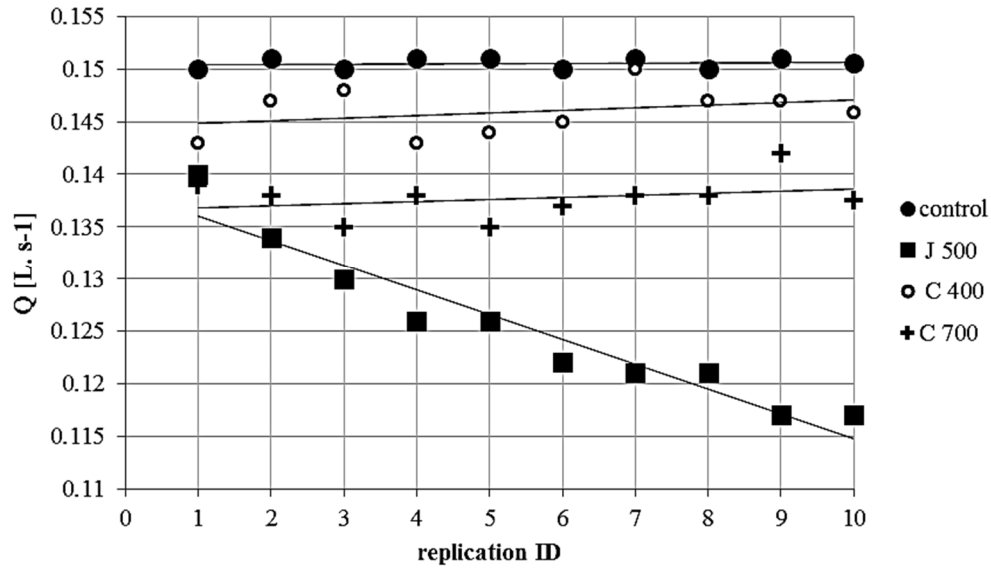

Colour version:

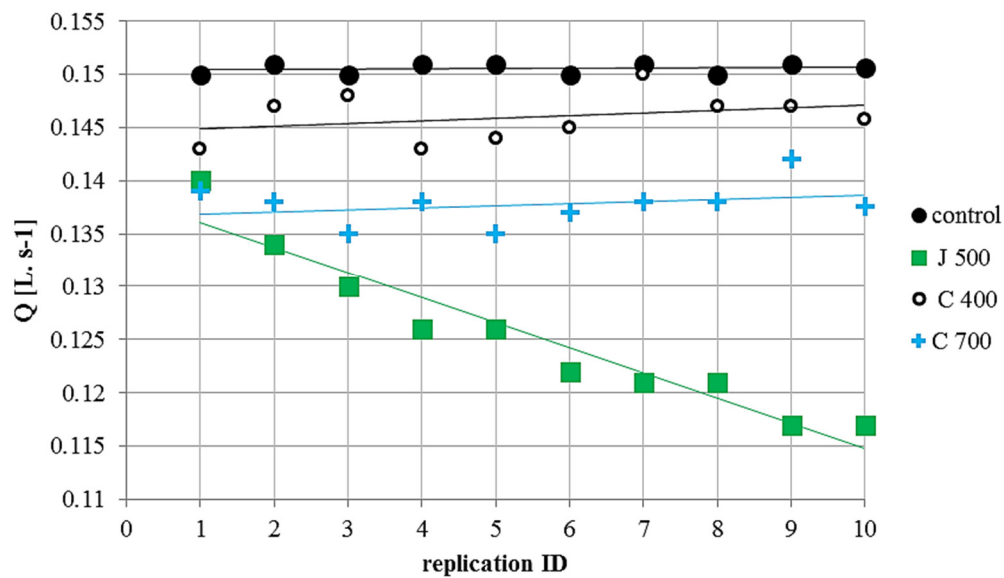

Supplement: Supplementary file [file Kalibova_et_al_manuscript_RC_edits.pdf › Kalibova_et_al_manuscript_RC_edits.pdf]
