# Supplementary material for: The effectiveness of jute and coir erosion control blankets in different field and laboratory conditions
Source: Copernicus journal article supplement (doi:10.5194/se-2016-8), 2016-01-18

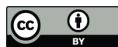

1 **The effectiveness of jute and coir erosion control blankets in**  
2 **different field and laboratory conditions**

3 J. Kalibová<sup>1</sup>, L. Jačka<sup>2</sup>, J. Petrů<sup>1</sup>

4 <sup>1</sup>Department of Land Use and Improvement, Czech University of Life Sciences Prague, Prague, Kamýcká 129,  
5 Praha 6 – Suchdol, 165 21, Czech Republic

6 <sup>2</sup>Department of Water Resources and Environmental Modeling, Czech University of Life Sciences Prague, Prague,  
7 Kamýcká 129, Praha 6 – Suchdol, 165 21, Czech Republic

8

9 *Correspondence to:* J. Kalibová (kalibova@fzp.czu.cz)

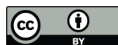

10 **Abstract.** A vegetation cover is found to be an ideal solution to most problems with erosion on steep slopes.  
11 Biodegradable geotextiles (GTX) have been proved to provide a sufficient protection against soil loss in the period  
12 before the vegetation reaches maturity. In this study, 500 g.m<sup>-2</sup> jute (*J500*), 400 g.m<sup>-2</sup> (*C400*), and 700 g.m<sup>-2</sup> coir  
13 (*C700*) GTX were installed firstly on 9° slope in “no-infiltration” laboratory conditions, secondly on 27° slope in  
14 natural field conditions. The impact of GTX on runoff and soil loss was investigated to compare the performance  
15 of GTX in different conditions. Laboratory runoff ratio (percentage portion of control plot) equaled 78 %, 83 %  
16 and 91 % and peak discharge ratio equaled 83 %, 91 % and 97 % for *J500*, *C700* and *C400*, respectively. In the  
17 field, a runoff ratio of 31 %, 62 % and 79 % and peak discharge ratio of 37 %, 74 % and 87 % were recorded for  
18 *C700*, *J500* and *C400*, respectively. All tested GTX significantly decreased soil erosion. The highest soil loss  
19 reduction in the field was observed for *J500* (by 99.4%) followed by *C700* (by 97.9%) and *C400* (by 93.8%).  
20 Irrespective of slope gradient or experiment condition, *C400* provided lower runoff volume and peak discharge  
21 control than *J500* and *C700*. The performance ranking of *J500* and *C700* in the laboratory differed from the field,  
22 which may be explained by different slope gradient and also by the role of soil, which was not included in the  
23 laboratory experiment.

24  
25 Key words: Soil loss, Steep slope, Runoff, Biological geotextiles, Rainfall simulator

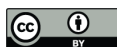

## 26 1 Introduction

27 Land degradation causes high erosion rates as a consequence of agriculture, grazing, mining, forest fires or  
28 deforestation and this causes an economic, social and environmental damage (Cerdà, 1998, Cerdà et al., 2010,  
29 Erkossa et al., 2015, Keesstra et al., 2014, Lieskovský and Kenderessy, 2014, Moreno-Ramón et al., 2014, Stanchi  
30 et al., 2015). However, the largest erosion rates and the most degraded soils are usually found in areas affected by  
31 developments, infrastructures or urbanization (Cerdà, 2007, Pereira et al., 2015, Sadeghi et al., 2015, Seutloali and  
32 Beckedahl, 2015).

33 Civil engineering projects often result in steep slopes with bare soil, which is highly vulnerable to soil erosion,  
34 caused either by impact energy of the rain drops or by surface runoff (Weggel and Rustom, 1992). Well-  
35 established, low-growing, dense vegetation cover is able to control soil loss by two or three orders of magnitude  
36 compared to bare soil condition (Rickson, 2006). The highest reduction of erosive runoff was recorded on  
37 permanently grassed plots (Álvarez-Mozos et al., 2014). However, the establishment of vegetation cover can be  
38 disrupted during early plant growth stages, leaving the slopes exposed to further erosion processes with negative  
39 consequences for slope stability (Rickson, 1988).

40 Biological/biodegradable geotextiles (GTX), made out of jute, coir, rice, straw etc., have often been proved to be  
41 an effective, sustainable and eco-friendly alternative to synthetic erosion control materials used for preventing soil  
42 erosion and subsequent slope degradation processes in the period before vegetation reaches maturity (Fullen et al.,  
43 2007, Khan and Binoy, 2012, Langford and Coleman, 1996, Morgan and Rickson, 1995, Ogbobe et al, 1998,  
44 Sutherland and Ziegler, 2007, etc.).

45 The range of GTX is wide. Based on the ratio of GTX' cost versus effectiveness, the choice of an individual  
46 product occurs to be most convenient.

47 Many case studies evaluating the effect of jute and coir GTX on slopes have been carried out across the world, but  
48 the reported effectiveness of GTX varies (Giménez-Morera et al., 2009) (see Table 1). Therefore, the results cannot  
49 be generalized (Cantón et al., 2011, Rickson, 2005). Furthermore, because of various site conditions, it is difficult  
50 to determine the extent to which the soil loss reduction was caused by GTX themselves and not by other factors  
51 (vegetation cover etc.) (Fifield, 1992, Toy and Hardley, 1987).

52 This paper presents a study, in which the effectiveness of three jute and coir fibre rolled erosion control systems  
53 (see Table 2), that are commercially available and widely applied world-wide, was tested under both laboratory  
54 and field conditions. No product with dense coverage (non-woven) was included, as it is not as effective in  
55 reducing runoff (Luo et al., 2013) and can produce even more runoff than bare soil (Davies et al., 2006, Mitchell  
56 et al., 2003).

57 Unlike in other previous laboratory studies, the impact of GTX was examined on “no-soil” subgrade, to omit one  
58 of the most variable factors affecting soil erosion – soil itself (Smets et al., 2011) – and to assess the effectiveness  
59 based on nothing but GTX' properties.

60 Due to the infiltration process, soil would support the erosion control effect of GTX providing less water for  
61 overland flow (Beven, 2012). Assuming that soil would affect all GTX equally in the field, the laboratory records  
62 of surface runoff volume (L) and peak discharges ( $L \cdot s^{-1}$ ) reduction should proportionally match the data from field  
63 experiments. Concerning the shear stress of overland flow, the character of surface runoff volume and velocity  
64 reduction in the laboratory should reflect soil loss reduction in the field as well (Harmon and Doe, 2001, Morgan  
65 and Rickson, 1995, Thompson, 2001).

66 The objective of this experiment was to test the impact of biodegradable erosion control GTX on surface runoff  
67 on a slope exposed to simulated rainfall under laboratory and field conditions; to rank the effectiveness of GTX in  
68 runoff reduction; to compare the runoff data trends under laboratory conditions (where soil subgrade and



69 infiltration process were excluded) with data trends under different field conditions (including soil subgrade and  
70 different slope gradient).

## 71 2 Materials and methods

### 72 2.1 Laboratory experiment

73 Laboratory experiments were conducted in the rainfall simulation laboratory at the Czech University of Life  
74 Sciences Prague, using a Norton ladder-type rainfall simulator. The simulator uses four Veejet 80100 nozzles, with  
75 water pressure of 0.04 MPa, height of 1.9 m and target area of 4.9 m × 1.05 m. The main rainfall characteristics  
76 are given in Table 3.

77 A slope gradient of 9° was used for the experiment. An impermeable plastic film spread over the test bed was used  
78 as a control. The tested GTX were then laid onto the plastic film to simulate no-infiltration conditions during the  
79 simulation (see Fig. 1). All treatments were exposed to rainfall of 1.75 mm.min<sup>-1</sup> intensity and 15 min duration.  
80 Ten rainfall simulations were carried out on each treatment (control, *J500*, *C400*, *C700*). To provide constant  
81 starting conditions, a 15-minute rainfall of 1.75 mm.min<sup>-1</sup> intensity was applied before each simulation. In a  
82 rainfall event, runoff initiation time  $t_i$  [s] was recorded, runoff was collected by a mechanical toggle flow-meter  
83 with electronic recording of time for each toggle and total runoff volume at time = 15 min  $R_{15}$  [L] and peak  
84 discharge  $Q$  [L.s<sup>-1</sup>] was measured. An outline of laboratory experiments is given in Table 4.

### 85 2.2 Field experiment

86 The field simulations were carried out on the south slope of the Rokycany–Pilsen rail corridor near the village of  
87 Klabava (49°44'56.938"N, 13°32'17.887"E) in the Pilsen Region, Czech Republic. According to Quitt's  
88 classification, Klabava falls into a moderately warm region with mean annual air temperature 8°C and mean annual  
89 precipitation 550 mm (Tolasz 2007).

90 The experimental slope was formed by a 1:2 (27°) cut. The stabilized unmade ground was covered by a gravelly  
91 loamy soil layer of 0.3 m thickness, 1.40 g.cm<sup>-3</sup> bulk density and 47 % porosity. A particle size analysis was  
92 performed, using hydrometer method. The soil texture was classified using the system of the United States  
93 Department of Agriculture. The tested soil was classified as gravelly loam (24 % clay, 40 % silt, 36 % sand).  
94 Percentage of gravel (> 2 mm) was 26 %. Estimated organic matter content of soil was 3.5 %.

95 Four rectangular plots (one control and three for the GTX treatments), each covering an area of 1.8 m × 8.5 m,  
96 were outlined by iron barriers on each side and a triangular collecting trough at the bottom (see Fig. 2), afterwards  
97 erosion control nets were installed. A bare soil plot was used as control.

98 The rainfall was simulated by 4 FullJet nozzles, with water pressure of 0.03 MPa and height 2.4 m above the plots.  
99 Rainfall application did not differ significantly among treatments ( $\alpha=0.05$ ). Three replications of each treatment  
100 were carried out at overall mean intensity of 1.33 ± 2 mm.min<sup>-1</sup>. (a 10-year return period at the study site). To  
101 provide constant starting conditions, a 15-minute rainfall of 1.33 mm.min<sup>-1</sup> intensity was applied before each  
102 simulation. For an outline of field experiment see Table 4.

103 For operational reasons, it was necessary to spread the simulations over a period of two days. The measurements  
104 were therefore carried out under slightly different moisture conditions. The control treatment was measured on the  
105 first day with initial volumetric soil moisture content being 20.7 %. The geotextile treatments were measured the  
106 following day with initial volumetric soil moisture content being 13.1 % (an average value of nine records – three  
107 for each plot). In the rainfall event, runoff initiation time  $t_i$  [s] was recorded, runoff was collected by a mechanical  
108 toggle flow meter with electronic recording of time for each toggle and the total runoff volume [L] and discharge  
109 [L.s<sup>-1</sup>] were measured. After the rainfall event, sediment concentration [g.L<sup>-1</sup>] of the runoff was determined by  
110 oven-drying five collected runoff samples at 105°C for 48 h and subsequent weighing of the samples, and sediment  
111 load (soil loss SL) [g] was calculated by multiplying the mean sediment concentration by total runoff volume.

### 112 2.3 Data analysis

113 All analyses were performed using Excel 2010 and R Statistical Software. One-way analysis of means was used  
114 to test whether the differences in laboratory values of time to runoff initiation  $t_i$  [s], runoff [L] at time  $t=15$  min  
115 ( $R_{15}$ ) and peak discharge  $Q$  [L.s<sup>-1</sup>] are caused by sampling variation, at significance level 0.05. Welch Two Sample  
116  $t$ -test, not assuming equal variances, was used to compare mean values of  $t_i$ ,  $R_{15}$  and  $Q$  for each treatment. The  
117 null hypothesis was defined as follows: The true difference in means is equal to zero.



118 In order to compare runoff (and soil loss) rates from field and laboratory plots, runoff ratios  $RR_{15}$  (Eq. 1), peak  
 119 discharge ratios  $QR$  (Eq. 2) and soil loss ratios  $SLR$  (Eq. 3) were calculated and expressed as a portion of control  
 120 [%]:

$$121 \quad RR_{15} = \frac{R_{15 \text{ geotextile}}}{R_{15 \text{ control}}} \times 100, \quad (1)$$

$$122 \quad QR = \frac{Q_{\text{geotextile}}}{Q_{\text{control}}} \times 100, \quad (2)$$

$$123 \quad SLR = \frac{SL_{\text{geotextile}}}{SL_{\text{control}}} \times 100, \quad (3)$$

124 Ratios were calculated from mean values of variables.

### 125 3 Results

126 Statistical description of results of peak discharge  $Q$  ( $L \cdot s^{-1}$ ) is shown in Table 5. Runoff  $R_{15}$  data were analysed  
 127 analogically.

128 Mean time to runoff initiation of the simulated rainfall in the laboratory was 16.3 s (standard deviation  $\sigma = 0.46$  s)  
 129 for control, 21.3 s ( $\sigma = 0.46$  s) for *J500*, 21.1 s ( $\sigma = 1.30$  s) for *C400* and 25.8 s ( $\sigma = 1.54$  s) for *C700*. The results  
 130 of a one-way analysis of mean values of runoff  $t_i$  ( $F = 28.484$ , num df = 2.000, denom df = 14.076, p-value =  $1.127$   
 131  $\times 10^{-5}$ , equal variance of datasets are not assumed) indicate that the differences in mean values of measured  
 132 geotextile samples are not caused by sampling variation, at significance level 0.05. The null hypothesis “The true  
 133 difference in means of time to runoff initiation is equal to zero” was rejected (by Welch Two Sample t-test, not  
 134 assuming equal variances) for all comparisons except *C700* vs *C400*: control and *J500* ( $t = -16.527$ , df = 10.423,  
 135 p-value =  $8.182 \times 10^{-9}$ ), control and *C400* ( $t = -10.447$ , df = 11.203, p-value =  $4.074 \times 10^{-7}$ ), control and *C700* ( $t$   
 136  $= -23.146$  df = 18, p-value =  $7.631 \times 10^{-15}$ ), *J500* and *C400* ( $t = 6.488$ , df = 17.173, p-value =  $5.304 \times 10^{-6}$ ) and  
 137 *J500* and *C700* ( $t = 7.641$ , df = 10.423, p-value =  $1.382 \times 10^{-5}$ ) and *C700* and *C400* ( $t = -0.435$ , df = 11.203, p-  
 138 value = 0.672) at significance level 0.05.

139 Mean runoff  $R_{15}$  in the laboratory was 130.9 L ( $\sigma = 0.30$  L) for control, 102.2 L ( $\sigma = 5.21$  L) for *J500*, 118.6 L ( $\sigma$   
 140  $= 1.43$  L) for *C400* and 109.0 L ( $\sigma = 1.79$  L) for *C700*. The results of a one-way analysis of mean values of runoff  
 141  $R_{15}$  ( $F = 100.414$ , num df = 2.000, denom df = 16.201, p-value =  $7.432 \times 10^{-10}$ , equal variance of datasets are not  
 142 assumed) indicate that the differences in mean values of measured geotextile samples are not caused by sampling  
 143 variation, at significance level 0.05. The null hypothesis “The true difference in means of runoff is equal to zero”  
 144 was rejected (by Welch Two Sample t-test, not assuming equal variances) for all comparisons: control and *J500* ( $t$   
 145  $= 16.494$ , df = 9.06, p-value =  $4.57 \times 10^{-8}$ ), control and *C400* ( $t = 25.2835$ , df = 9.793, p-value =  $3.02 \times 10^{-10}$ ),  
 146 control and *C700* ( $t = 36.2216$ , df = 9.506, p-value =  $1.65 \times 10^{-11}$ ), *J500* and *C400* ( $t = -9.1049$ , df = 10.344, p-  
 147 value =  $2.927 \times 10^{-6}$ ) and *J500* and *C700* ( $t = -3.7024$ , df = 11.092, p-value = 0.003) at significance level 0.05.

148 The results of a one-way analysis of mean values of peak discharge  $Q$  ( $F = 52.051$ , num df = 2.000, denom df =  
 149 13.494, p-value =  $4.53 \times 10^{-7}$ , equal variance of datasets are not assumed) indicate that the differences in mean  
 150 values of measured geotextile samples are not caused by sampling variation, at significance level 0.05. The null  
 151 hypothesis “The true difference in means of peak discharge is equal to zero” was rejected (by Welch Two Sample  
 152 t-test, not assuming equal variances) for all comparisons: control and *J500* ( $t = 9.978$ , df = 8.084, p-value =  $8.00$   
 153  $\times 10^{-6}$ ), control and *C400* ( $t = 5.854$ , df = , p-value =  $2.719 \times 10^{-4}$ ), control and *C700* ( $t = 26.096$ , df = 10.069, p-  
 154 value =  $1.4 \times 10^{-10}$ ), *J500* and *C400* ( $t = -7.567$ , df = 9.797, p-value =  $2.146 \times 10^{-5}$ ), *J500* and *C700* ( $t = -4.365$ , df  
 155  $= 8.639$ , p-value = 0.002) and *C400* and *C700* ( $t = 9.012$ , df = 13.009, p-value =  $5.897 \times 10^{-7}$ ) at significance level  
 156 0.05.

157 In short, all GTX samples significantly delayed the runoff initiation in comparison with control. Jute *J500* was  
 158 proved to be significantly more effective than both coir GTX. No statistically significant difference in time to  
 159 runoff initiation was found between coir GTX *C400* and *C700*. Mean values of runoff and discharge are  
 160 significantly different for all tested GTX. All GTX significantly reduced runoff and peak discharge with jute net  
 161 *J500* being the most effective under laboratory conditions. The results of the rainfall simulation experiments in the  
 162 laboratory are shown in Fig. 3 and Fig. 4.

163  
 164 Mean time to runoff initiation of the simulated rainfall in the field was 295 s (792 s, 50 s and 44 s for first, second  
 165 and third rainfall event) for control, 120 s (-, 120 s, 120 s) for *J500*, 268 s (-, 280 s, 255 s) for *C400* and 325 s (-,  
 166 405 s, 245 s) for *C700*. For *J500*, *C400* and *C700* no runoff was produced during the first rainfall event.

167  
 168 In general, control plots tended to produce highest runoff volume (L) and discharge ( $L \cdot s^{-1}$ ). Concerning the time  
 169 of runoff initiation, runoff was most quickly produced at the control plot, followed by coir *C400*, jute *J500* and  
 170 coir *C700* in the laboratory. In the field, *J500* treated plots produced runoff faster than *C700*.



171 The order control – *C400* – *J500* – *C700* matches the impact of GTX on runoff volume and discharge for the first  
 172 rainfall event in the laboratory. For next replications, an obviously decreasing trend of  $R_{15}$  and  $Q$  for *J500* was  
 173 recorded, showing jute GTX to be the most effective. Other GTX seemed to provide slightly increasing trends  
 174 (Fig. 3, 4).

175  
 176 Table 6 shows a comparison of runoff ( $RR_{15}$ ) and peak discharge (QR) ratios for both laboratory and field  
 177 conditions. In the laboratory, the greatest decrease in  $RR_{15}$  was recorded by the *J500* jute net ( $RR_{15} = 78\%$ ) in  
 178 comparison with control (100%). The order of effectiveness of each treatment in the laboratory was identical for  
 179 both runoff volume and peak discharge: 1. *J500*, 2. *C700* and 3. *C400*.

180 Different effectiveness ranking was observed in the field. The highest reductions of runoff volume and peak  
 181 discharge were observed for coir *C700* ( $RR_{15} = 31\%$ , QR = 37%) followed by jute *J500* ( $RR_{15} = 62\%$ , QR = 74  
 182 %).

183  
 184 Results of soil loss ratio from the field experiment are also given in Table 6. All GTX provided a great reduction  
 185 of soil loss with jute *J500* being the most effective followed by coir *C700* and *C400*.

## 186 4 Discussion

### 187 4.1 Time to runoff initiation

188 In general, control plots (bare soil/impermeable plastic film without GTX) have a significantly faster response to  
 189 rainfall than GTX-treated plots (also reported by Cerdà et al., 2009). The performance of GTX seems to be highly  
 190 influenced by the infiltration rate as the surface runoff was initiated after less than 30 s on impermeable subgrade  
 191 (laboratory experiment) and after two-six minutes on soil (field experiment). The very short time to runoff  
 192 initiation means that any thunderstorm will contribute to runoff and soil loss on sloping bare soil (Cerdà et al.,  
 193 2009). The high bulk density of the soil ( $1.40\text{ g.cm}^{-3}$ ) (frequently present on slopes created during civil engineering  
 194 projects) can be the explanation for the fast runoff initiation, and the large runoff volumes and sediment available  
 195 are due to raindrop impact on bare soils (Cerdà and Jurgensen, 2008).

196 The results of laboratory-based rainfall simulations indicated that the GTX significantly delayed the time to runoff  
 197 initiation. Similar results were obtained by Shao et al. (2014) or Sutherland and Ziegler (2007). According to mean  
 198 values, *C700* performed better than *J500*. When studying the results of individual replications, *J500* reached the  
 199 peak discharge earlier than *C700*, but the discharge values remain lower than for *C700*. Time of runoff initiation  
 200 was longer for *C700*, but higher peak discharge values were observed. Better performance of jute *J500* compared  
 201 to both coir GTX was probably caused by lower water absorbing capacity and lower flexibility of coir GTX, due  
 202 to which the GTX did not lay directly on the subgrade, allowing water to flow over a smoother surface under GTX.  
 203 Same observation was previously reported also by Rickson (2006). In the literature, significant differences between  
 204 GTX-covered and control (bare soil) plots were both confirmed (Sutherland and Ziegler, 2007) and not proved  
 205 (Rickson, 2000). Possible explanation could be the different infiltration capacity of used soil subgrade. Rickson  
 206 (2000) used more permeable sandy loam, while Sutherland et Ziegler (2007) used clay (see Table 1), therefore it  
 207 seems that the smoother and less permeable the subgrade, the higher is the delay in the GTX' effect, as the low  
 208 infiltration capacity of subgrade provides higher volume of surface runoff.

### 209 4.2 Runoff volume reduction

210 Results of laboratory simulations showed a significant decrease in runoff volume [L] from GTX-treated plots.  
 211 Similar results were reached by Khan and Binoy (2012), Shao et al. (2014) or Sutherland and Ziegler, 2007 (see  
 212 Table 1). On contrary, some studies (both field and laboratory) concluded, that GTX increase the runoff volume  
 213 (Álvarez-Mozos et al., 2014, Giménez-Morera et al., 2010, Kertész et al., 2007). The increase might be caused by  
 214 a dense cover of GTX (Mitchel et al., 2003) or high slope gradient when water can flow through the GTX fibers  
 215 without infiltration into the soil (Álvarez-Mozos et al., 2014). In this study, the runoff control effect of GTX was  
 216 supported by the infiltration process leading to higher runoff reduction in the field in comparison to laboratory,  
 217 despite higher slope gradient ( $27^\circ$ ).

218 The GTX effectiveness ranking in the laboratory significantly differed from the field data. In the laboratory the  
 219 runoff ratios of 78%, 83% and 91% were recorded for jute *J500*, coir *C700* and coir *C400*, respectively. In the  
 220 field, the runoff ratios were the following: 62%, 31% and 79% for the same order of GTX (see Table 6). Coir  
 221 GTX *C700* performed significantly higher runoff reduction than jute *J500* in the field. The same result were  
 222 reported by Álvarez-Mozos et al. (2014) from a  $60^\circ$  slope, while on  $45^\circ$  slope jute performed better than coir. If  
 223 more replications were carried out in the field, a different trend possibly might be found, because a decreasing  
 224 trend of runoff volume is obvious for jute *J500* under laboratory “no-soil” conditions, while coir *C700* shows an



225 increasing trend (see Fig. 3). Similar behaviour was observed in the field, where the runoff ratio of 66 % and 59 %  
226 (first and second replication) was observed for *J500* and 24 % and 38 % for *C700*. More replications in the field  
227 would prove whether the decreasing trend for jute and increasing trend for coir would continue in the field alike  
228 during the laboratory experiment.  
229 Higher runoff reduction of *C700* might also be explained by its slightly higher loop size in comparison with *J500*  
230 (see Table 2). In theory, *C700* might provide more space for rainfall water to fall directly to the soil surface and  
231 then infiltrate, which would lead to lower surface runoff volume. While on jute-treated plot the rainfall water was  
232 initially absorbed by the fibers and then brought down through them due to gravity.

### 233 4. 3 Soil loss reduction

234 According to laboratory test, jute *J500* seemed to have the highest impact on peak discharge and runoff velocity.  
235 Therefore, lower shear stress might be assumed for jute *J500* (Thompson, 2001) than for coir GTX which would  
236 lead to lower erosion rate in the field. This was confirmed both in the field experiment of this study and in the  
237 work of Rickson (2000, 2006). All GTX significantly reduced soil loss (see Table 6). Despite much higher runoff  
238 volume of jute-treated plot, SLR equaled to 0.6 % for jute *J500*, followed by coir *C700* with SLR = 2.1 %. The  
239 performance of jute and coir *C700* may be considered to be comparable as the little difference might have been  
240 caused by soil loss measurement error.  
241 Álvarez-Mozos et al. (2014) reported similar behaviour of jute and coir GTX. In their study, jute performed better  
242 runoff reduction but higher soil loss than coir on 45° slope. On 60° slope the situation was reversed, jute showed  
243 worse runoff reduction but better erosion control than coir. Authors explain this by the theory that on gentle or  
244 moderate slopes, biological GTX might absorb rainfall water and slow runoff generation, whereas on steep slopes  
245 water can slip through the geotextile fibers and create superficial flow paths without infiltrating into the soil. This  
246 factor seems to be more crucial for jute than coir due to its higher water absorbing capacity (Gosh, 2014). In this  
247 study, the runoff control effect of GTX varied under different slope gradients even when lower values (9° and 27°)  
248 were used. It is interesting that differences in performance were recorded for slope ranges which do not overlap  
249 (9° vs 27° and 45° vs 60°). A threshold value of slope gradient, at which GTX' behaviour changes, needs to be  
250 established. Potentially, if the field and laboratory experiments were both carried out on slope gradient either below  
251 or above this threshold, the match between datasets would be reached.  
252 The rigidity of GTX fibers may play an important role too, as the smoother structure of jute GTX probably provides  
253 better condition for water flow through fibers in comparison with the tougher coir fibers.  
254 Furthermore, the contact between GTX and soil plays a very important role (Midha and Suresh Kumar, 2013). It  
255 seems to decrease as the slope gradient and GTX material rigidity increases (Chen et al., 2011, Midha and Suresh  
256 Kumar, 2013). This may apply also for this study – jute probably absorbed more rainfall water into its fibers and  
257 thanks to gravity this water was brought down through the fibers, causing almost no erosion. In spite of being  
258 provided by the same supplier, coir *C700* was visually observed to have slightly higher cover in the field  
259 (manufacturing variability). This might lead to higher retention of rainfall water, but because of lower contact with  
260 the soil due to its rigidity, the erosion rate of plot with coir was higher than for jute. Other explanation might be  
261 that due to the structure of fibers, water flows slower through coir than through jute. Additionally, coir fibers create  
262 higher obstacles for overland flow due to its larger diameter and also the clogging of spaces among fibers.  
263 Therefore, at coir *C700* plot the water runoff was lower but the sediment content was higher. Further investigation  
264 of the interactions between eroded soil particles and GTX fibers during rainfall events would be valuable to test  
265 this theory. According to this experiment, it seems that slope gradient is not the only factor determining GTX  
266 performance. Soil characteristics and GTX-soil interface need to be considered along with the slope gradient.  
267 The field experiment was carried out on a steeper slope (27°) than the laboratory experiment (9°). Authors  
268 proceeded to compare these two datasets because, according to some studies, GTX effectiveness increases with  
269 the slope gradient (Morgan et al. 2005). This fact was partly confirmed by Álvarez-Mozos et al. (2014), who  
270 examined the impact of GTX on runoff volume and soil loss on 45° and 60° slope. On 45° slope the soil loss was  
271 reduced by 69 % and 90 % by jute and coir, respectively. On 60° slope, the reduction was 60 % for jute and 56 %  
272 for coir. Again, different behaviour (performance ranking) was recorded with changing slope which makes the  
273 need of finding slope gradient threshold values beyond which the performance of GTX changes. In this study it is  
274 not possible to determine whether the soil erosion control performance increased in the field as “no-soil” conditions  
275 were used in the laboratory. Furthermore, without any other field records from lower slope gradient and same soil  
276 conditions to be compared with, it would be highly complicated to separate erosion control effect of GTX from  
277 the impact of soil infiltration on soil loss in the field. Also lower rainfall intensity applied in the field for operational  
278 reasons, might slightly modify the results. But for a pilot research on whether the performance ranking of GTX is  
279 the same in the field and in the laboratory, this deviation might be acceptable. For further research more consistent  
280 conditions definitely would be required, but the data presented here can shed more light on the behaviour of GTX  
281 under different site conditions.



282 **5 Conclusion**

283 Jute and coir geotextiles tested in this study can significantly delay the initiation of surface runoff under the  
284 simulated rainfall, when compared to control plots (bare soil in the field, impermeable plastic film in the  
285 laboratory) without GTX. Control plots tended to produce significantly higher runoff volume [L], discharge [L.s-  
286 1] and soil loss [g.] than GTX-treated plots.

287 In the laboratory, jute *J500* showed increasing trend of runoff control, unlike coir GTX, the performance of which  
288 gradually decreased. Further investigation is needed to prove whether this behavior appears also in the field.

289 Regardless the conditions (slope, laboratory vs field), coir *C400* showed to be less effective than jute *J500* and  
290 *C700*. The runoff control performance of jute *J500* and coir *C700* significantly differed between the “no-soil”  
291 laboratory and field conditions, but all GTX provided a great reduction of soil loss with jute *J500* being the most  
292 effective followed by coir *C700* and *C400*. The theory that soil would influence the performance of all GTX  
293 equally (same effectiveness ranking in the laboratory as in the field) was not confirmed, which makes the need of  
294 finding slope gradient threshold values beyond which the performance of GTX changes. Influence of the slope  
295 gradient and soil-GTX contact on runoff and soil loss reduction still need to be investigated in detail. Another  
296 experimental testing of GTX effectiveness using different slope gradient and soil subgrade is suggested by authors.



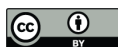

297 **6 Author contribution**

298 J. Kalibová designed the experiments and carried them out together with J. Petrů. L. Jačka performed laboratory  
299 and statistical analyses. J Kalibová prepared the manuscript with contributions from all co-authors.

300 **7 Data availability**

301 The data are publicly accessible.

302 **8 Acknowledgement**

303 This experiment was supported by the Internal Grant Agency of Czech University of Life Sciences Prague, grant  
304 IGA 20144225. The authors are grateful to their colleagues from the Faculty of Environmental Sciences, who  
305 helped with fieldwork.

306 **9 References**

- 307 Álvarez-Mozos, J., Abad, E., Giménez, R., Campo, M. A., Goñi, M., Arive, M., Casali, J., Díez, J., Diego, I.:  
 308 Evaluation of erosion control geotextiles on steep slopes. Part 1: Effects of runoff and soil loss, *Catena*, 118,  
 309 168-178, doi: 10.1016/j.catena.2013.05.018, 2014.
- 310 Beven, K. J.: *Rainfall-runoff modelling: the primer*, John Wiley & Sons, 449 pp., ISBN: 978-0-470-71459-1,  
 311 2011.
- 312 Bhattacharyya, R., Smets, T., Fullen, M. A., Poesen, J., Booth, C. A.: Effectiveness of geotextiles in reducing  
 313 runoff and soil loss: A synthesis, *Catena*, 81, 184-195, doi: 10.1016/j.catena.2010.03.003, 2010.
- 314 Cantón, Y., Solé-Benet, A., de Vente, J., Boix-Fayos, C., Calvo-Cases, A., Asensio, C., Puigdefábregas, J.:  
 315 A review of runoff generation and soil erosion across scales in semiarid south-eastern Spain. *J. Arid*  
 316 *Environ.*, 75, 1254-1261, doi: 10.1016/j.jaridenv.2011.03.004, 2011.
- 317 Cerdà, A.: Effect of climate on surface flow along a climatological gradient in Israel: A field rainfall simulation  
 318 approach, *J. Arid Environ.*, 38 (2), 145-159, doi: 10.1006/jare.1997.0342, 1998.
- 319 Cerdà, A.: Soil water erosion on road embankments in eastern Spain, *Sci. Total Environ.*, 378 (1-2), 151-155,  
 320 doi: 10.1016/j.scitotenv.2007.01.041, 2007.
- 321 Cerdà, A., Jurgensen, M.: The influence of ants on soil and water losses from an orange orchard in eastern Spain.  
 322 *J. Appl. Entomol.-Zeitschrift für Angewandte Entomologie*, 132 (4), 306-314, doi: 10.1111/j.1439-  
 323 0418.2008.01267.x, 2008
- 324 Cerdà, A., Giménez-Morera, A., Bodí, M. B.: Soil and water losses from new citrus orchards growing on sloped  
 325 soils in the western Mediterranean basin. *Earth Surf. Process. Landforms*, 34, 1822-1830, doi:  
 326 10.1002/esp.1889, 2009
- 327 Cerdà, A., Lavee, H., Romero-Díaz, A., Hooke, J., Montanarella, L.: Soil erosion and degradation in  
 328 mediterranean type ecosystems. *Land Degrad. Dev.*, 21 (2), 71-74, doi: 10.1002/ldr.968, 2010.
- 329 Chen, S. C., Chang, K. T., Wang, S. H., Lin, J. Y.: The efficiency of artificial materials used for erosion control  
 330 on steep slopes. *Earth Sci. and Environ.*, 62, 197-206, doi: 10.1007/s12665-010-0514-6, 2011.
- 331 Davies, K., Fullen, M. A., Booth, C. A.: A pilot project on the potential contribution of palm-mat geotextiles to  
 332 soil conservation. *Earth Surf. Process. Landf.*, 31, 561-569, doi: 10.1002/esp.1349, 2006.
- 333 Erkossa, T., Wudneh, A., Desalegn, B., Taye, G.: Linking soil erosion to on-site financial cost: Lessons from  
 334 watersheds in the Blue Nile basin, *Solid Earth*, 6 (2), 765-774, doi: 10.5194/se-6-765-2015, 2015.
- 335 Fifield, J. S.: How effective are erosion control products in assisting with dryland grass establishment with no  
 336 irrigation? Proceedings of the XXIII th IECA Annual Conference „The environment is our future“, Reno,  
 337 Nevada, February 1992, 321-334, 1992.
- 338 Fullen, M. A., Booth, C. A., Sarsby, R. W., Davies, K., Kugan, R., Bhattacharyya, R., Subedi, M., Poesen, J.,  
 339 Smets, T., Kertész, Á., Tóth, A., Szalai, Z., Jakab, G., Kozma, K., Jankauskas, B., Jankauskiene, G.,  
 340 Bühmann, C., Paterson, G., Mulibana, E., Nell, J. P., van der Merwe, G. M. E., Guerra, A. J..T., Mendonça,  
 341 J. K. S., Guerra, T. T., Sathler, R., Bezerra, J. F. R., Peres, S. M., Yi, Z., Yongmei, L., Li, T.,  
 342 Panomtarachichigul, M., Peukrai, S., Thu, D. C., Cuong, T. H., Toan, T. T., Jonsyn-Ellis, F., Jallow, S., Cole,  
 343 A., Mulholland, B., Dearlove, M., Corkill, C.: Contributions of biogeotextiles to sustainable development and  
 344 soil conservation in developing countries: the BORASSUS Project. In: *Ecosyst. Sustain. Dev.* WIT Press,  
 345 Southampton (UK), 123-141, 2007.
- 346 Giménez-Morera, A., Ruiz Sinoga, J.D., Cerdà, A.: The impact of cotton geotextiles on soil and water losses  
 347 from mediterranean rainfed agricultural land, *Land Degrad. Dev.*, 21 (2), 210-217. doi: 10.1002/ldr.971,  
 348 2010.
- 349 Gosh, S. K.: A Review on Jute Geotextile and its Geo-Technical Applications with respect to Environmental  
 350 Concern. *International Journal of Innovative Research in Science & Engineering* ISSN [Online] URL.  
 351 <http://ijirse.in/docs/Dec13/IJRSE1607.pdf>. Cited: 12/01/2015., 2014.
- 352 Harmon, R. S., Doe, W. W. (Eds.): *Landscape Erosion and Evolution Modeling*, Kluwer, New York, 540 pp.  
 353 ISBN: 0-306-46718-6, 2001.
- 354 Ingold, T. S., Thomson, J. C.: Results of current research of synthetic and natural fiber erosion control systems.  
 355 *Erosion Control: Proceedings of Conference XVII*, International Erosion Control Association, 17-28  
 356 February, Dallas, Texas, 65-73, 1986.
- 357 Jakab, G., Szalai, Z., Kertész, Á., Tóth, A., Madarász, B., Szabó, S.: Biological geotextiles against soil  
 358 degradation under subhumid climate – a case study. *Carpathian J. Earth Environ. Sci.*, 7 (2), 125-134, 2012.
- 359 Keesstra, S.D., Maroulis, J., Argaman, E., Voogt, A., Wittenberg, L.: Effects of controlled fire on hydrology and  
 360 erosion under simulated rainfall. *Cuader. Invest. Geográf.*, 40, 269-293, doi: 10.18172/cig.2532, 2014.



- 361 Kertész, A., Toth, A., Szalai, Z., Jakab, G., Kozma, K., Booth, C. A., Fullen, M. A., Davies K.: Geotextile as a  
 362 tool against soil erosion in vineyards and orchards. In: Kungolas, A., Brebbia, C. A., Beriatos, E. (Eds.):  
 363 Sustainable Development and Planning III, Vol. 2, WIT Press, Southampton, UK, 611–619, 2007.
- 364 Khan, A. J., Binoy, T. H.: Top Soil Erosion Control Using Geojute., Proceedings of International Conference on  
 365 Advances in Civil Engineering, Delhi, India. 28 – 29 December, 146-150, 2012.
- 366 Langford, R. L., Coleman, M. J.: Biodegradable erosion control blankets prove effective on Iowa wildlife refuge.  
 367 Proceedings of XXVII th International Erosion Control Association Conference, Seattle, USA, March 1996,  
 368 13 – 20, 1996.
- 369 Lekha, K. R.: Field instrumentation and monitoring of soil erosion in coir geotextile stabilized slopes – A case  
 370 study, *Geotext. Geomembr.*, 22, 399-413, doi: 10.1016/j.geotextmem.2003.12.003, 2004.
- 371 Lieskovský, J., Kenderessy, P.: Modelling the effect of vegetation cover and different tillage practices on soil  
 372 erosion in vineyards: A case study in vrábľa (Slovakia) using WATEM/SEDEM *Land Degrad. Dev.*, 25 (3),  
 373 288-296, doi: 10.1002/ldr.2162, 2014.
- 374 Luo, H., Zhao, T., Dong, M., Peng, X., Guo, Y., Wang, Z., Liang, C.: Field studies on the effect of three  
 375 geotextiles on runoff and erosion of road slope in Beijing, China. *Catena*, 109, 150-156, doi:  
 376 10.1016/j.catena.2013.04.004, 2013.
- 377 Midha, V. K., Suresh Kumar, S.: Influence of woven structure on coir rolled erosion-control products. *Geosynth.*  
 378 *Internation.*, 20 (6), 396-407, doi: 10.1680/gein.13.0027, 2013.
- 379 Mitchell, D. J., Barton, A. P., Fullen, M. A., Hocking, T. J., Zhi, W. B., Yi, Z.: Field studies of the effects of jute  
 380 geotextiles on runoff and erosion in Shropshire, UK. *Soil Use Managem.*, 19, 182-184, doi: 10.1111/j.1475-  
 381 2743.2003.tb00301.x, 2003.
- 382 Moreno-Ramón, H., Quizembe, S.J., Ibáñez-Asensio, S.: Coffee husk mulch on soil erosion and runoff:  
 383 Experiences under rainfall simulation experiment, *Solid Earth*, 5 (2), 851-862, doi: 10.5194/se-5-851-2014,  
 384 2014.
- 385 Morgan, R. C. P.: *Soil Erosion and Conservation* (third edition), Blackwell Publishing, Oxford, UK, 304 pp.,  
 386 2005.
- 387 Morgan, R. P. C., Rickson, R. J. (Eds.): *Slope Stabilization and Erosion Control: A Bioengineering Approach*  
 388 Morgan. E & FN SPON, Cranfield, UK, 274 pp., 1995.
- 389 Ogbobe, O., Essien, K. S., Adebayo, A.: A study of biodegradable geotextiles used for erosion control.  
 390 *Geosynth, Internation*, 5 (5), 545-553, doi: 10.1680/gein.5.0131, 1998.
- 391 Pereira, P., Gimeñez-Morera, A., Novara, A., Keesstra, S., Jordán, A., Mastro, R. E., Brevik, E., Azorin-Molina,  
 392 C., Cerdà, A.: The impact of road and railway embankments on runoff and soil erosion in eastern Spain.  
 393 *Hydrol. Earth Syst. Sci. Discuss.*, 12, 12947-12985, doi:10.5194/hessd-12-12947-2015, 2015.
- 394 Rickson, R. J.: The use of geotextiles in soil erosion control: comparison of performance on two soils. In:  
 395 Rimwanich, S., (Ed.): *Proceedings of Land Conservation for Future Generations, V. International Soil*  
 396 *Conservation*, Bangkok, Thailand, January 1998, 961-970, 1988.
- 397 Rickson, R. J.: The use of geotextiles for soil erosion control, Ph. D. thesis, Cranfield University, Cranfield, UK,  
 398 295 pp., 2000.
- 399 Rickson, R. J.: Management of sediment production and prevention in river catchments: A matter of scale? In:  
 400 Owens, P. N., Collins, A. J. (Eds.): *Soil Erosion and Sediment Redistribution in River Catchments:*  
 401 *Measurement, Modelling and Management*, CAB International, Wallingford, UK, 228 – 238, 2005.
- 402 Rickson, R. J.: Controlling sediment at source: an evaluation of erosion control geotextiles. *Earth Surf. Process.*  
 403 *Landf.*, 31, 550-560, doi: 10.1002/esp.1368, 2006.
- 404 Sadeghi, S. H. R., Gholami, L., Sharifi, E., Khaleidi Darvishan, A., Homae, M.: Scale effect on runoff and soil  
 405 loss control using rice mulch under laboratory conditions, *Solid Earth*, 6 (1), 1-8. doi: 10.5194/se-6-1-2015,  
 406 2015.
- 407 Seutloali, K.E., Beckedahl, H. R.: Understanding the factors influencing rill erosion on roadcuts in the south  
 408 eastern region of South Africa, *Solid Earth*, 6 (2), 633-641, doi: 10.5194/se-6-633-2015, 2015.
- 409 Shao, Q., Gu, W., Dai, Q., Makoto, S., Liu, Y.: Effectiveness of geotextile mulches for slope restoration in semi-  
 410 arid northern China. *Catena*, 116, 1-9, doi: 10.1016/j.catena.2013.12.006, 2014.
- 411 Smets, T., Poesen, J., Bhattacharyya, R., Fullen, M. A., Subedi, M., Booth, C. A., Kertesz, A., Szalai, Z., Toth,  
 412 A., Jankauskiene, G., Guerra, A. J. T., Bezerra, J. F. R., Yi, Z., Panomtaranichagul, M., Buhmann, C.,  
 413 Paterson, G.: Evaluation of biological geotextiles for reducing runoff and soil loss under various  
 414 environmental conditions using laboratory and field plot data. *Land Degrad. Dev.*, 22, 480-494, doi:  
 415 10.1002/ldr.1095, 2011.
- 416 Stanchi, S., Falsone, G., Bonifacio, E.: Soil aggregation, erodibility, and erosion rates in mountain soils (NW  
 417 Alps, Italy). *Solid Earth*, 6 (2), 403-414, doi: 10.5194/se-6-403-2015, 2015.
- 418 Sutherland, R. A., Ziegler, A. D.: Hillslope runoff and erosion as affected by rolled erosion control systems: a  
 419 field study. *Hydrol. Process.*, 20, 2839–2855, doi: 10.1002/hyp.6078, 2006.



- 420 Sutherland, R. A., Ziegler, A. D.: Effectiveness of coir-based rolled erosion control systems in reducing  
421 sediment transport from hillslopes. *Appl. Geogr.*, 27, 150-164, doi: 10.1016/j.apgeog.2007.07.011, 2007.
- 422 Thompson, A. M.: Shear stress partitioning for vegetation and erosion control blankets. Ph. D. thesis,  
423 Department of Biosystems and Agricultural Engineering, University of Minnesota, St. Paul, Minnesota (UMI  
424 Number: 3032015), 2001.
- 425 Tolasz, R.: Atlas podnebí Česka: Climate Atlas of Czechia. 1st edition. Czech Hydrometeorological Institute,  
426 Prague, Czech Republic, 255 pp., 2007.
- 427 Toy, T. J., Hadley, R. F.: Geomorphology and reclamation of disturbed lands. *Earth Surf. Process. Landf.*, 14  
428 (8), 754-755, 1987.
- 429 Weggel, J. R., Rustom, R.: Soil Erosion by Rainfall and Runoff – State of the Art. *Goetext. Geomembr.*, 11, 551-  
430 572, doi: 10.1016/0266-1144(92)90032-6, 1992.

**Table 1**

Overview of studies investigating the impact of *J500* jute (500 g.m<sup>-2</sup>) and *C400*, *C700* coir (400 g.m<sup>-2</sup>; 700 g.m<sup>-2</sup>) geotextiles on surface runoff and soil erosion by water since 2000\*.

| Author                        | GTX type                     | Soil type<br>(sand - silt - clay; %)    | Slope<br>[°] | Simulated<br>rainfall<br>intensity<br>[mm h <sup>-1</sup> ] | control sample<br>cover type | runoff<br>reduction<br>[% of<br>control] | Soil loss<br>reduction<br>[% of<br>control] | Lab./<br>Field<br>[L/F] |
|-------------------------------|------------------------------|-----------------------------------------|--------------|-------------------------------------------------------------|------------------------------|------------------------------------------|---------------------------------------------|-------------------------|
| Álvarez-Mozos et al. (2014)   | <i>J500</i>                  | silty clay loam<br>(13.8 - 53.9 - 32.3) | 45°          | max. 31.2                                                   | hydroseeded soil             | <b>266</b>                               | 31                                          | F                       |
|                               | <i>J500</i>                  | silty clay loam<br>(13.8 - 53.9 - 32.3) | 60°          | max. 31.3                                                   | hydroseeded soil             | <b>238</b>                               | 40                                          | F                       |
| Shao et al. (2014)            | <i>J500</i>                  | mixed substrate                         | 40°          | 50                                                          | bare substrate               | 37.9                                     | 0.3                                         | L                       |
| Khan Binoy (2012)             | <i>J500</i>                  | sandy                                   | 33°          | 122                                                         | bare soil                    | 83                                       | 10                                          | L                       |
| Jakab et al. (2012)           | <i>J500</i>                  | silty loam<br>(23 - 70 - 7)             | 8.5°         | max. 38.7                                                   | bare soil                    | 47, 74, <b>119</b>                       | 20                                          | F                       |
| Kertész et al. (2007)         | <i>J500</i>                  | silty loam                              | 11°          | max. 83                                                     | bare soil                    | 30 - <b>250</b>                          | 7 - <b>306</b>                              | F                       |
| Sutherland and Ziegler (2007) | <i>C700</i>                  | clay<br>(24 - 34 - 42)                  | 5.5°         | 35                                                          | bare soil                    | 84                                       | 0.4                                         | F                       |
|                               | <i>C400</i>                  | clay<br>(24 - 34 - 42)                  | 5.5°         | 35                                                          | bare soil                    | 90                                       | 8                                           | F                       |
| Rickson (2006)                | <i>J500</i>                  | sandy loam                              | 10°          | 72                                                          | bare soil                    | <b>102</b>                               | 15                                          | L                       |
| Sutherland and Ziegler (2006) | <i>C700</i>                  | sandy loam                              | 10°          | 72                                                          | bare soil                    | <b>106</b>                               | 51                                          | L                       |
|                               | <i>J500</i> ,<br><i>C700</i> | clay-dominated<br>oxisol                | 5.5°         | 35, 114                                                     | bare soil                    | 91 - <b>104</b>                          | 17                                          | F                       |
| Lekha (2004)                  | <i>C700</i>                  | sandy loam                              | 26°          | NA**                                                        | seeded bare soil             | NA**                                     | 0.4 - 21.9                                  | F                       |
| Mitchel et al. (2003)         | <i>J500</i>                  | loamy sand                              | 15°          | NA**                                                        | bare soil                    | 35                                       | 1                                           | F                       |
| Rickson (2000)                | <i>J500</i>                  | sandy loam                              | 10°          | 35                                                          | bare soil                    | 90                                       | 14                                          | L                       |
|                               | <i>C700</i>                  | sandy loam                              | 10°          | 35                                                          | bare soil                    | 97                                       | 25                                          | L                       |
|                               | <i>J500</i>                  | sandy loam<br>(68.1 - 22.1 - 9.8)       | 10°          | 95                                                          | bare soil                    | 90                                       | 23                                          | L                       |
|                               | <i>C700</i>                  | sandy loam<br>(68.1 - 22.1 - 9.8)       | 10°          | 95                                                          | bare soil                    | 102                                      | 23                                          | L                       |

\*For studies carried out before the year 2000, see the papers of Bhattacharyya et al. (2010) or Ingold and Thompson (1986).

\*\*NA = not available



**Table 2**

Main characteristics of three tested biological GTX.

| Treatment                            | 1 - Jute net                                                       | 2 - Coir net                                                       | 3 - Coir net                                                       |
|--------------------------------------|--------------------------------------------------------------------|--------------------------------------------------------------------|--------------------------------------------------------------------|
| Marking                              | <i>J500</i>                                                        | <i>C400</i>                                                        | <i>C700</i>                                                        |
| Material                             | 100% jute fiber                                                    | 100% coir fiber                                                    | 100% coir fiber                                                    |
| Description                          | open weave biodegradable<br>jute geotextile in a grid<br>structure | open weave biodegradable<br>coir geotextile in a grid<br>structure | open weave biodegradable<br>jute geotextile in a grid<br>structure |
| Mass per area (g.m <sup>-2</sup> )   | 500                                                                | 400                                                                | 700                                                                |
| Mesh size (mm × mm)                  | 15 × 15                                                            | 35 × 35                                                            | 20 × 20                                                            |
| Thickness (mm)                       | 2                                                                  | 7                                                                  | 8                                                                  |
| Open area (%)                        | 60                                                                 | 65                                                                 | 50                                                                 |
| Working life (years)                 | 1 - 2                                                              | 3 - 4                                                              | 3 - 7                                                              |
| Average price (EUR/m <sup>2</sup> )* | 0.61 – 0.96                                                        | 0.89 – 1.29                                                        | 1.29 – 2.09                                                        |

\* Data obtained from several GTX suppliers.



**Table 3**

Main laboratory rainfall characteristics measures by Laser Precipitation Monitor.

| Mean intensity          | Time-specific kinetic energy                          | Volume-specific kinetic energy             | Median volumetric drop diameter | Christiansen Uniformity |
|-------------------------|-------------------------------------------------------|--------------------------------------------|---------------------------------|-------------------------|
| I [mm.h <sup>-1</sup> ] | KE <sub>R</sub> [J.m <sup>-2</sup> .h <sup>-1</sup> ] | KE [J .m <sup>-2</sup> .mm <sup>-1</sup> ] | d <sub>50</sub> [mm]            | CU [%]                  |
| 105                     | 1269                                                  | 12                                         | 0.44                            | 79                      |



**Table 4**

An outline of laboratory and field experiments testing the impact of biological GTX on surface runoff and soil loss.

|                                          | Laboratory experiments   | Field experiments       |
|------------------------------------------|--------------------------|-------------------------|
| Substrate type                           | impermeable plastic film | gravelly loam           |
| Slope (°)                                | 9                        | 27                      |
| Rainfall intensity (mm.h <sup>-1</sup> ) | 105                      | 80                      |
| Experiment duration (min)                | 15                       | 15                      |
| Cover type                               | <i>J500, C400, C700</i>  | <i>J500, C400, C700</i> |
| Control cover                            | impermeable plastic film | bare gravelly loam      |
| Replications                             | 10                       | 3                       |
| Total number of experiments              | 40                       | 12                      |



**Table 5**

Statistical description of peak discharge for 500 g.m<sup>-2</sup> jute net (*J500*), 400 g.m<sup>-2</sup> coir net (*C400*), and 700 g.m<sup>-2</sup> coir net (*C700*); laboratory experiments.

| Parameters               | Units             | Control | <i>J500</i> | <i>C400</i> | <i>C700</i> |
|--------------------------|-------------------|---------|-------------|-------------|-------------|
| Arithmetic mean          | L.s <sup>-1</sup> | 0.151   | 0.126       | 0.146       | 0.137       |
| Standard deviation       | L.s <sup>-1</sup> | 0.0005  | 0.0076      | 0.0025      | 0.0015      |
| Median                   | L.s <sup>-1</sup> | 0.151   | 0.126       | 0.145       | 0.138       |
| Minimum                  | L.s <sup>-1</sup> | 0.150   | 0.117       | 0.143       | 0.135       |
| Maximum                  | L.s <sup>-1</sup> | 0.150   | 0.140       | 0.150       | 0.139       |
| Range                    | L.s <sup>-1</sup> | 0.001   | 0.023       | 0.007       | 0.004       |
| Coefficient of variation | %                 | 0.004   | 0.058       | 0.017       | 0.011       |
| CI mean 0.95*            | L.s <sup>-1</sup> | 0.0004  | 0.0056      | 0.0019      | 0.0011      |

\*The confidence interval of the mean calculated at the 0.95 significance level.



**Table 6**

Mean runoff ratios  $RR_{15}$  [%], peak discharge ratios QR [%] and soil loss SLR [%] ratios of jute  $500 \text{ g.m}^{-2}$  (*J500*), coir  $400 \text{ g.m}^{-2}$  (*C400*) and coir  $700 \text{ g.m}^{-2}$  (*C700*) GTX, compared to control treatments under field and laboratory conditions.

|       | mean runoff ratio $RR_{15}$ |             |             |             | mean peak discharge ratio QR |             |             |             | mean soil loss ratio SLR |             |             |             |
|-------|-----------------------------|-------------|-------------|-------------|------------------------------|-------------|-------------|-------------|--------------------------|-------------|-------------|-------------|
|       | [%]                         |             |             |             | [%]                          |             |             |             | [%]                      |             |             |             |
|       | control                     | <i>J500</i> | <i>C400</i> | <i>C700</i> | control                      | <i>J500</i> | <i>C400</i> | <i>C700</i> | control                  | <i>J500</i> | <i>C400</i> | <i>C700</i> |
| lab.  | 100                         | 78          | 91          | 83          | 100                          | 83          | 97          | 91          | 100                      | -           | -           | -           |
| field | 100                         | 62          | 79          | 31          | 100                          | 74          | 87          | 37          | 100                      | 0.6         | 6.2         | 2.1         |



**Figure 1** Norton Ladder Rainfall Simulator above test beds with mechanical toggle flow metres. *C400* coir erosion control net spread in the test bed.

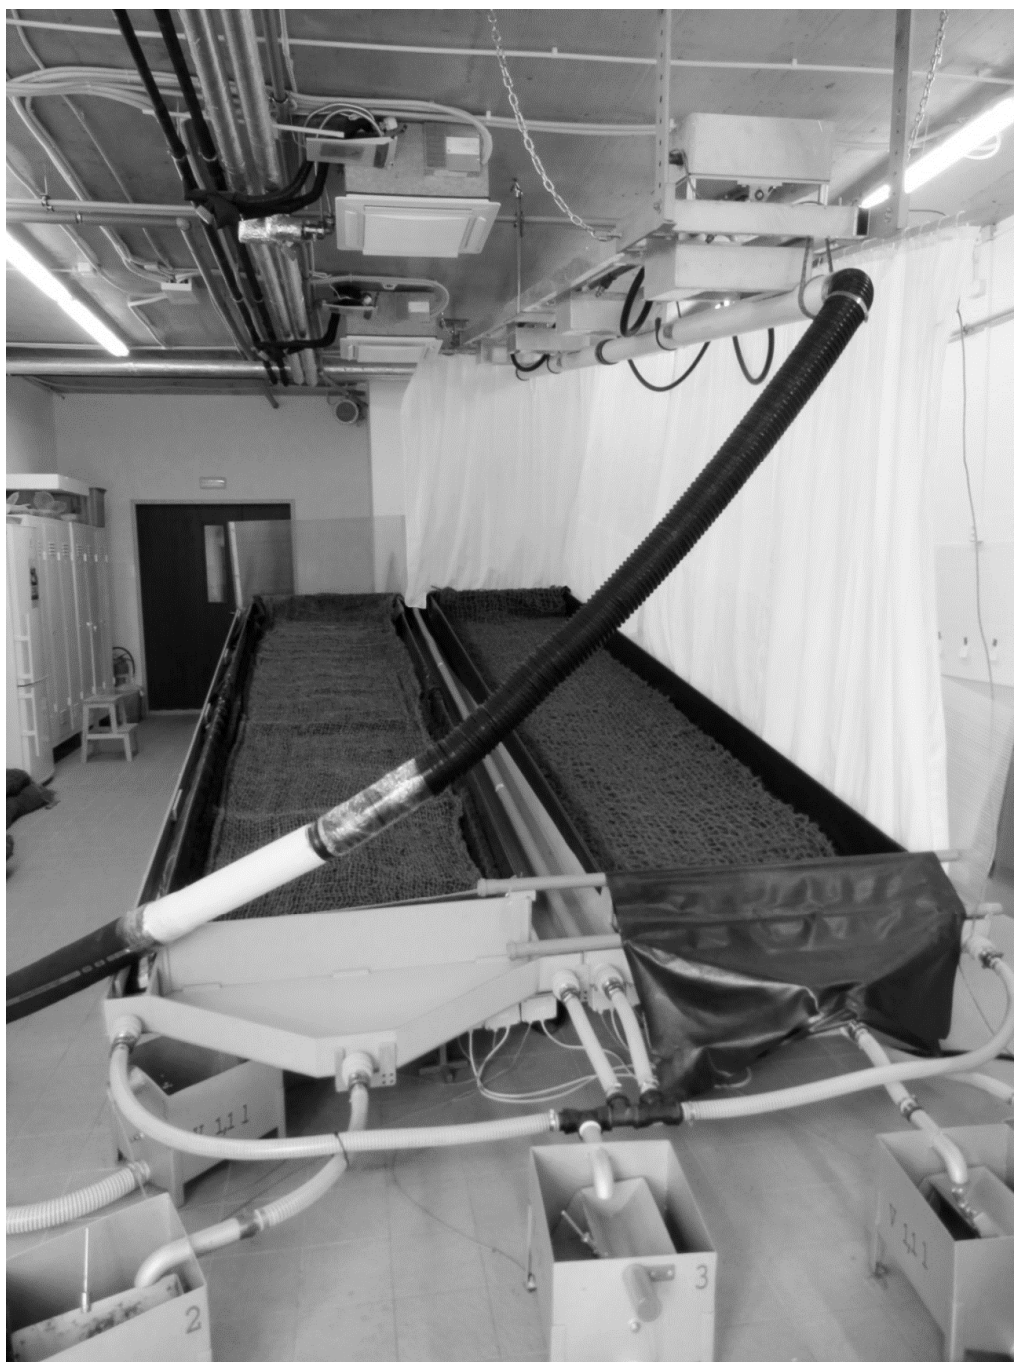

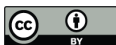

**Figure 2**

Experimental slope in the field (Rokycany, Czech Republic). Rainfall simulation on bare soil (control sample) in progress. Note: the iron collecting trough at the bottom of the plot is hidden below the eroded material as the figure was taken during the rainfall simulation.

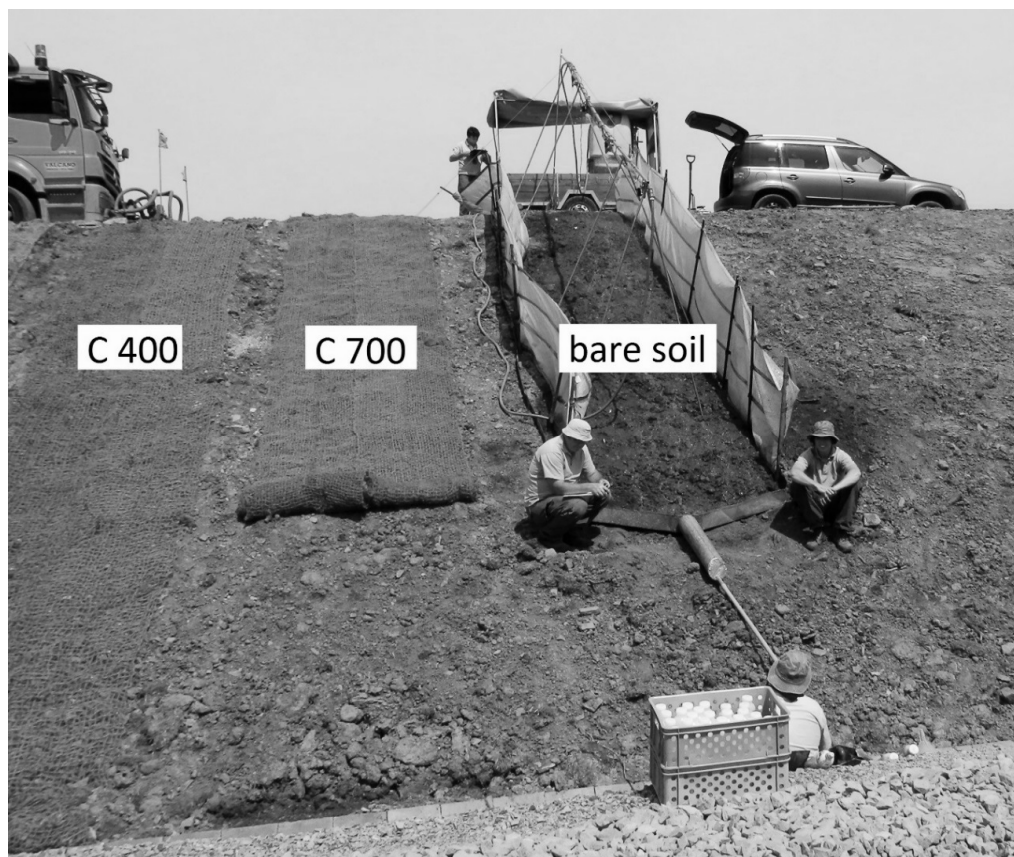



**Figure 3**

Surface runoff volume at time = 15 minutes,  $R_{15}$  (L); linear trend-lines included; laboratory conditions. For the data see supplementary Table S1.

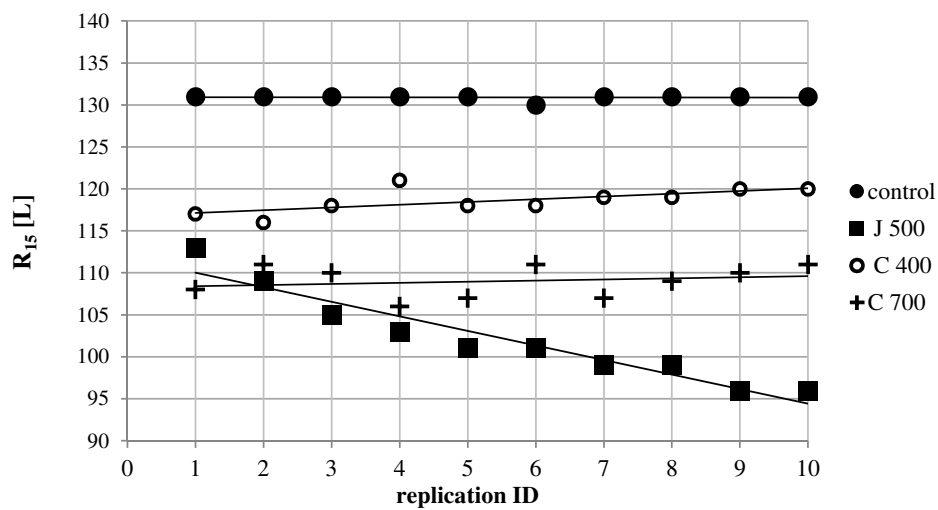



**Figure 4**  
Peak discharge at outlet section,  $Q$  (L.s<sup>-1</sup>); linear trend-lines included; laboratory conditions. For the data see supplementary Table S2.

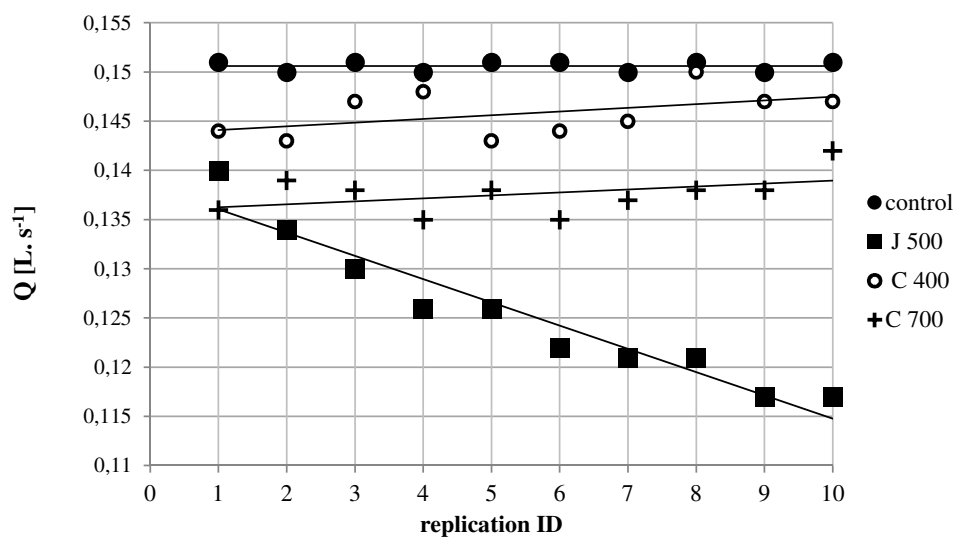

Supplement: Supplementary file [file se-2016-8-RC1-supplement.pdf]
